# Supplementary material for: SABinder: A Web Service for Predicting Streptavidin-Binding Peptides
Source: Biomed Res Int. 2016 Aug 17;2016:9175143. doi: 10.1155/2016/9175143 (PMC5005764; doi:10.1155/2016/9175143)
Supplement: Supplementary file 1 — Supplementary Material A: All peptides in the positive dataset and the negative dataset are provided. Supplementary Material B: All peptides in the NDFT and SAART independent testing datasets are provided. Supplementary Material C: Performances of each submodel are provided in Table S1. Results of each submodel trained with various machine learning methods are provided in Table S2. [file 9175143.f1.zip]

Archive with 3 entries (3 files):
- Supplementary material A.xls
- Supplementary material B.xls
- Supplementary material C.docx
