# Supplementary material for: SABinder: A Web Service for Predicting Streptavidin-Binding Peptides
Source: Biomed Res Int. 2016 Aug 17;2016:9175143. doi: 10.1155/2016/9175143 (PMC5005764; doi:10.1155/2016/9175143)
Supplement: Supplementary file 1 — Supplementary Material A: All peptides in the positive dataset and the negative dataset are provided. Supplementary Material B: All peptides in the NDFT and SAART independent testing datasets are provided. Supplementary Material C: Performances of each submodel are provided in Table S1. Results of each submodel trained with various machine learning methods are provided in Table S2. [file 9175143.f1.zip › Supplementary material A.xls]

## Sheet: positive dataset
ADTICWYVCTISVHA
AFWAWL
AGFEG
AKSSAKGKASGV
ALCCLSSPHPNGAIF
APRDPLS
CFNGQEDRINHPQG
CLAVLQNEVHPVYD
DDFRFTLPRCCV
DKYRIVIARGCV
DLSSPWLVGHPQAT
DPFFYTP
DPYKLPNRRCCI
DRILAIGYRCCV
DVGFIDRNWCCV
DVGSWSGNEFIHPQ
EYLSGVQFATWQCP
FNWSLDYLREYH
FVGYGFL
GDFRFT
GDWAFI
GDWVFI
GFRHPQF
GHPQFHF
GHPQIGR
GHPQRWT
GLDHHPP
GLYNHPQ
GMTEWWYGLRCVVA
GNFVFI
GSYWHPQ
GTFAHPQ
GTFDHPQ
GTFIHPQ
GVLHPFHHPGNV
GYDKHPQ
HFTNHPQ
HHPMDNRSYRWP
HLANHPQ
HLENHPM
HLEPLIS
HLIAHPQ
HLYAHPQ
HMASWLRFFHGP
HPMAARN
HPMAPLR
HPMAPRT
HPMRP
HPMVP
HPQAGKR
HPQAPRW
HPQF
HPQFA
HPQFATR
HPQFEAL
HPQFI
HPQFLSL
HPQFM
HPQFN
HPQFNL
HPQFP
HPQFPL
HPQFR
HPQFRH
HPQFSN
HPQFTL
HPQFWRL
HPQGDR
HPQGP
HPQGPP
HPQNA
HPQNDTG
HPQNH
HPQNN
HPQNP
HPQSGR
HPQVA
HPQVK
HPQVM
HPQVP
HPQVR
HPQVS
HPQVYRA
HPQYP
HRISWPS
HTKHPQF
HYEGHPQ
IAPNHPQ
ICSYVMYTTCFLRVY
IHRFI
IHRFL
IMMECFYVCTIANTQ
IPEWHPQ
IPYWHPQ
ISFENTWLWHPQFSS
ISSTHPQ
ISTVPNYLRHFH
ITDWLSHPQGPRSN
KHPQF
KRHPHVG
KRHPMVG
KRHPQVG
LAYWEFVFHPQGDDL
LCHPQFPRCNLFRKV
LCHPQNCHTKSL
LHPMNNR
LHPQF
LHPQSGR
LNHPMDNRLHVSTSP
LPMMHIT
LPVWCVMHVCLTSSR
LYDIDRNWVGHPQG
LYKVPSHCHPMMPC
MHSDLDNMWETHPQ
MHVETALVRCCI
MLWYSPHSFSHPQNT
MPDLTTHPQFAR
MQSHQDS
MYSADDTFRHMHPQ
NAMPWFM
NEWYCQNVCERMPHS
NLISHPQ
NLLNHPQ
NLVNHPQ
NLVSHPQ
NPTKHQM
NYDADLAWDTHPQD
NYHHLRDLRSYH
PCHPQYRLCQRPLKQ
PDRLRSPMRCCI
PHPMF
PLLAHPQ
PRDTNTIRRCCV
PWAWLI
PWAWLT
PWDWLY
PWLWLQ
PWPWLG
PYYNRHHPQDNR
QPFLHPQGDERWYMI
QRHPMVG
REPDWYEYVK
RHPQF
RKHPQIG
RKHPQVG
RLEICQNVCYYLGTL
RQMMHIT
RWIDATSHPQFD
SDDWWHDHPQNLRSS
SFNGFQNEGHPLDD
SINLMDRFASHPQA
SITICWYTCMVQKTA
SLIAHPQ
SLLAHPH
SLLAHPQ
SLLSHPQ
SLVSHPM
SMWAHSSRDDAV
SPEPDWFVEL
SPTYQRL
STHTSAQ
SWWLSWHPQNTKELG
TLIAHPQ
TLISHPQ
TLLAHPQ
TLLNHPQ
TLQPGGA
TPSPLAG
TVLICMNICWTGETQ
TWTVGCSCMMACVH
TWVQCTMVCYGMSTT
TWWGYL
VCAWLEVESHPVRE
VEAWIADPAVHFTT
VEAWIMHPCPLCSC
VEAWISYQSPLPDQ
VEAWLADRSQVSPN
VEAWLDERVPLVET
VESWVEQYSVPIVP
VHRFI
VHRFV
VLSWLESNSVRITR
VNAWVSNMDCKECR
VRHPQFG
VTPTMHP
VTSLCMNVCYSLTTY
VVFRPHYLSGFH
WAVMHIP
WGPYPEWLRFYH
WHPQF
WHRWPWLVSG
WHWWYWALDR
WPVMHAF
WQVMHLK
YLVNHPQ
YMEHSRV
YTIADLITRCCV
YWNSNDMAMHPQVN
YWVCMNVCMYYTARQ

## Sheet: negative dataset
Negative sub-dataset 1
AAAHALF
ADNPIKWDRART
AFHAR
AGSYWCKAWGLDCTS
AIQLVYDKWAMP
ALPSSQL
ANPMKYLLSRPL
APNSNRR
AQIHFLP
ARWIWYRNTATLNSV
ASTNVFARPMYL
AVCTDF
AYGLA
CKSLRPH
DAKNSNSRILDQ
DGFGWD
DKKYYGC
DLYYGRV
DPRLSAL
DRSILVPRYFELWAN
DTDSHVNL
DWSWGLHMTRLG
ECHFLFLLCRVWGR
EGLSEIE
ELGFELG
EPDKSII
ERHTKFPSV
ETHHAHR
FAFGFFGGRVWIPRG
FFPQPWA
FHQATNWKPAPS
FLLEPHTVTWGA
FNTHTAN
FRAARHPQL
FSRGDR
FVNGRSF
GAMHLPWHMGTL
GEPSVVISRSSRLSP
GGLAGGF
GHTQDIT
GLFREGW
GMWWWPLFTL
GPNQVEW
GPTRILK
GRLKMVPDLE
GSAVASTLPLGQ
GTICVCTFFCMVRCA
GVSLVST
HADQLPM
HEEARPH
HGVRGNLIS
HIRWDVNHNSMS
HLNILSTLWKYR
HMTRND
HPHQAHPSPKAH
HPVHPHR
HSACDLPKAPWC
HSSPHFSRHGLL
HTQNMRMYEPWF
HWSAWWIRSNQS
IDPNRPN
IISCDEGVG
INPTQTT
IQYRSWIPFSYP
ITGDRLAYFAYR
KAFAGTHTDTIT
KFHTHFH
KIAK
KLPGWSG
KNFTHTD
KPRMPPR
KRSKKCLRKNGS
KTEGQPF
KVWTLNPDHPPV
LAPGDQG
LDQIVIPWPTPR
LGEAGGG
LHRPHLYHVWQR
LLAGWIP
LMRRNARIAV
LPHWQSH
LPSISDLL
LQPQAKNVPTSS
LRWDNFTSKD
LSPPPTH
LTLPAAL
LVAFAN
LWRGPK
MAVPTSI
MGSPLKW
MLFNISE
MPNTKPL
MRNRA
MTLPAAS
MWVFSRGDSSLFCCG
NDLTPLR
NGSVRSF
NHYMSWQ
NLEPYPL
NMSIQWHRDFNK
NPGNYTQYRTTN
NPTQRPD
NRLPREL
NSTHPRA
NVHRGLH
PAGAASR
PEVRAQDGLPWYLWK
PHKNNST
PKWRHGYTRF
PMFPNTS
PPLPLP
PQQLTRI
PSELKG
PTFMA
PVTWI
QANNTHM
QFNPVY
QHTSGRG
QLNKLQIPLSII
QNMNNWTLASIM
QPSYTVPIARHA
QSAHRGDIPNVL
QTALITIHHSLT
QVWPSSH
RALNPSM
RDSSAHQ
RGDHLSH
RGR
RIPAAWFSSA
RLELAIPLQGSG
RNGVGLVIQ
RPYGLL
RRPVVDAGWNMS
RSNGVG
RTPTLF
RVWSDEHSAQMA
SAALPAR
SATY
SDWQHPW
SFMFPPW
SGRIIGS
SHLSTMV
SHYPQELWAGSS
SKKRFPNTSFRQ
SLKIRWELKMYQE
SLSRMPIIGTSA
SMPTYNK
SNSMHLMTMTGL
SPKRKAN
SPRLTMPPKVPG
SQLQTTK
SRLDSPF
SSKRSTS
SSSSFVLWLLRPGFS
STIYNDD
STTVRPHTSDVW
SVSVGTKPRPRP
SWPWYHPHIKSH
SYSSFHR
TAVTNSMMERLW
TEPWLPSNPSWA
TGNPPPN
THQNRQTADIPS
TKMRLE
TLPMSDR
TMGFTRPRFPHY
TNTSWMTAMTPF
TPPPRDASLSRW
TQFEGRR
TRKALTQNT
TSLRELPAEWSR
TSYGRPALLPAA
TTRSPRLPIELLFAG
TWDLRIHRSVHG
VAAGGGL
VEPATP
VHDFKLINMKNS
VLNWPGMLLV
VNRIPGENLSSP
VPSFVPL
VRMSDTMLY
VSQRVGFITSAP
VVPRGSS
WARSESP
WGENFIQVPVSE
WHQTYTSSLWES
WKKKLGASP
WPFHHHR
WQRPYPH
WSVRYDYLVYPSLLP
WWLGERV
YDESTYHQGQKR
YGNSLPPRLGPP
YKNVDSGG
YNPRLHI
YPWINQP
YSDLSKLLTL
YTPKATR
YWNPFFL
Negative sub-dataset 2
AAGPRPTS
ADRSIMW
AFMMKKPSE
AHALTTEE
AIVTALIELGPPVES
ALQIHTM
ANTTPRH
APPMHII
AQPPKSEGWTLR
ASASHLNKRFMT
ASWDVNPVP
AVIRAQWELGPPVES
AYKQTYHETTWF
CLLTT
DAPTFGS
DGKTLLH
DKWAGLL
DMPKQLLAPWYY
DPTDYSTRPHMW
DRWRPALPVVLFPLH
DTHRWPWYISQE
DWWSYAWTLV
EDLETSIWR
EGRFSAW
ELKQSAQVQAKI
EPGRMVEALGPRFES
ERNYNDFCDPGRVGL
ETNWTHRPPLRV
FAKNSNSRILDQ
FGENRPA
FHRPN
FLPEVLL
FPARSEASGRQRRQPGRDVTHGEAVRVNIL
FRGDFS
FSSQMRY
FVSPSWK
GAREM
GESTHG
GGMKCW
GIDYRARLL
GLGYRTAHI
GNLSWSG
GPPPHHRDYHGP
GPWYCTLGLCHFRSS
GRLTQTLGYQAQ
GSFSAEHFLDDFAIW
GTLRF
GVVRGPSRG
HAIYPRH
HEPSSFVFFPLS
HHELDSLRARLM
HKAHEYDPWISP
HLPPNHT
HNIGTWGPKSHL
HPLFHHQTATAT
HQAHNHTHPSSL
HSEWRARLA
HSSWYIQHFPPL
HTSTYWWLDGAP
HWSTRVHHTPNS
IDWRSRLAP
IKLPALF
IPDQGNKPKSRL
IRKTR
ITMWDF
KAMSWYA
KFQLPSW
KIMRMPRLMTRN
KLPSKFH
KNPHHSLWYLHK
KPSTLML
KRVSKN
KTIPSAAT
KWELTYFANSFP
LARGGTSSMGWIEQGEVRWGCHNGRCSRIG
LDSMHFPFHSRSFWP
LGGKKKR
LHTPWHLPAPEI
LLEAWLG
LNDNSAGY
LPKRSPI
LPSQPSQ
LQRMSYM
LSADTLRSNSVDHDRVQNEVRSSRERRQPR
LSQNGLTSFN
LTMAG
LVDHHQTYTTPP
LWWSPSW
MCWDCTLHARSD
MHGPTKNQMWHT
MLPEVLP
MPPTDYCSLCIK
MSALPSA
MTPEGRV
MYNDRTRSFIAS
NDSQCWKLGCIAEK
NHDYWYWLFENV
NILSTLL
NLLIPENVPLRH
NMSSLTI
NPHPQQP
NPVEHFLSAKLW
NRPSSWL
NSVMIA
NVPWGRY
PAKQKAH
PFFHLIG
PHNTTAS
PLDKRPM
PMRPKGPDTLLYTLP
PPLPSP
PQVRPI
PSGTARA
PTHYISTSL
PWLIRGLVGC
QASISPA
QFTSLLH
QIARGD
QLPKHNYWPGAF
QNSARQQ
QPTPRST
QSFPRQL
QTGGLGVKYFRV
QWEIRYPWPSMG
RAPPGISSA
RDWVGWVCL
RGDLAAPHRTGA
RGRTLHL
RIPRPL
RLGPLHFLNAWGHDH
RNPKKAT
RQFPHSSSMYTD
RRRKLRTQRLII
RSPKSLT
RTRYIN
RWGAGRT
SAFDNPY
SAVRP
SEAGSRY
SFPPDYWRHYRM
SGRRGPR
SHNPNPF
SIARPL
SKMGWSKPPPIP
SLLYEINPG
SLTEKNW
SMSIASPQIPWS
SNVECDGLNCDWII
SPLKLSRSSMYV
SPRTPLS
SQMQILSGSHLA
SRNHILT
SSLFWHR
SSTRSLTFDFNMLHS
STKRKPN
STYGSHLGWGHF
SVVLNWN
SWSIVPTSPIIL
SYTPHRT
TCVLHRQRCLMFTLR
TESAPYF
TGPLPNR
THRPPMWSPVWP
TKPKRNN
TLPWLEESYWRP
TMNNTTATVSPS
TPAYMLT
TPPYRAALATPVLLL
TQHNPHQ
TRLYITD
TSMIYRPHNVQTLLH
TTAAVDMPRSTP
TTSSEHV
TWIRSAL
VAGPRMTE
VFAGKPSHKPPH
VHLDSAFWFVRTDFD
VLPTFKREMTLV
VNVEYRN
VPTATLMGASAR
VRRGRS
VSSIAGC
VVVGSLVVARLR
WAWVWLTETAV
WGILSRAATNSGWVGLIPHK
WHSDMEWWYLLG
WKSPVLM
WPHHFPH
WRGVYFGDRWLGSQP
WSYIPVV
WWRPPVL
YDMSLIG
YGSAFTM
YLAHTAK
YNSLSGRSLHPDIGF
YPYSMWKNLWPS
YSGKHSS
YTRPLPT
YYCSPWCD
Negative sub-dataset 3
AAKTWNA
ADWPHARGKFALGNA
AFPSPTL
AHHHWHPLPTLP
AKEGDLNKYKPW
ALRTASS
APATRPT
APQ
AQREANKKIEKQLQK
ASFFAVQ
ASYWKDWLHDTAGGGVW
AVPLNTSVLHTT
AYPLSLISRAPP
CMRRGER
DATSAQV
DGTKMAGG
DKWAPRQ
DNAIYTYQ
DQMMLPWPAVKL
DSASDLYKLL
DTPLTTAALRLV
DYHNHLT
EDWFSASIRRVPTFA
EGWHAHT
ELNPSRS
EPLVQHP
ERQVITGRV
ETRNVAS
FAPEDLPNYPQR
FGGSVAP
FHWRWSTFPEYP
FLPYARWFSR
FPGKQTT
FRIVTCATCVILKAFMGWHYHISRSRS
FSVPWPTRPPHW
FWEPPWG
GASMTLGRL
GFELET
GGPNSRVRPW
GIHPWTK
GLKTNPA
GNSLRWD
GPRAYHE
GQDHRERLL
GRPLPPS
GSGWPWAEA
GTRFALETS
GWGDVALCDPLLP
HALGPSS
HETFPSPRANSV
HHIDSLW
HKHRRRD
HLPTNTKPYWMA
HNLKRPT
HPLQVFV
HQIETLLHWFKP
HSHHTLTPDPPL
HSTWKLLRLDME
HTTPSHLHPHSR
HWYDRDR
IEWPVSD
IKTDEKMGLWDLYSM
IPHWVQT
IRPMLPG
ITQKQAA
KATNMHM
KGAYYQS
KIPSAFA
KLSPNMTLLGPP
KNVHPPP
KPVDLTA
KSASWDGLW
KTLTLEAALRNAWLREVGLK
KWLWGSSRWE
LASKPMP
LDYRSWAPYATS
LGNQGLSLTLRL
LIDYRQRLA
LLGNIPP
LNLTQSR
LPLTPLP
LPSWHRF
LQVWWLGPVR
LSAVHNM
LSRKKTLTT
LTPAQPQ
LVLASN
LYMIKWPGSED
MDHLAPTFRPAI
MHNHHNHPRPSS
MLQPQAP
MPSAVHLFETMR
MSHMDSP
MTQQSST
NAEGVRL
NELHMKQH
NHFLLWR
NIPWWPFSLHAP
NLNQHIRSLSIP
NNATFEDG
NPIEQMLDYAKS
NPVENMMDRDSQ
NRTPEILHSIMH
NTAFPSGTS
NVTTMTNHLVYS
PAPRSQESVGQTRVRVGRCEASRLGRSWCQ
PFIR
PHQRNVS
PLGKLPW
PNCWVGLTGAHSCFL
PPPGLSTAP
PRDSMLFMPCKFRPM
PSISDLLAI
PTLWQLYQFPLRLSG
PWSTQYA
QAWNERGLWT
QGFLDQ
QILWSDVRGKFE
QLRGDGW
QNWVPFN
QPWWAFF
QSHSAFV
QTINYGH
QWIFGMS
RARGQGW
REMVFY
RGDLLHASARAS
RGVKMH
RIVLGPARFFFPQSYLLDQG
RLKPPNPTE
RNSDKPK
RQLGKQR
RRTNWQGAG
RSRLGHPVNHHRSRLAEQISQRRS
RTTGSVFHL
RWPELE
SAGSVAL
SCFRDVC
SEFPRSWDMETN
SFRPTPP
SGTWAVFPFLWLDLMW
SHQDNLL
SIEYWLDWL
SKRASI
SLMVSVFPFLWMDLMW
SLTPLLFNYDVA
SMTC
SNYLMYI
SPLNNFYKTQLR
SPSFPLWSFSYL
SQSFHYW
SRPSRQPSASPT
SSLPTPSESPSR
SSVLYGGPPSAA
STLLPES
SVARFLVVD
SVYSDLHKLA
SWTPDKWLRPSG
SYYHTPSNYKYR
TDGQLRR
TFASVMT
TGSLAIS
THSKSF
TKSPPLQ
TLQTTPHDVARL
TMRGDV
TPDSRGIHGAPS
TPQTWPL
TQLATDFGSRLP
TRRETPA
TSNYSILYTEFA
TTFHYWS
TTTPHNS
TWPQWWWTNSKG
VAPRGDRPTLPI
VFLTAQTVP
VHNSHASWRYTG
VLSDPPP
VPAVPLD
VPVCREGWCG
VRSKAPR
VSVGMLW
VWGLPSCTLAHG
WDANGKT
WGQNIKA
WHSTMSWTNSTW
WLAPWLG
WPKYTPRVFPHF
WRLSDHRMV
WTITKHP
WWWQTFDAR
YDSWHYW
YHANSQGAV
YLHIVFQVPT
YNYSWNGVVFVP
YQEETPASSFSR
YSIPKSS
YTTHVKPFAPSS
YYPPAHR
Negative sub-dataset 4
AANDKMQKFRLV
AEEGGTS
AFVALGSLSYGLHGP
AHKHKHPGHITA
AKIRF
ALSSNHPPAQPT
APFAHAT
APQTYQTSYRSP
AQTLSGTLASHT
ASIEELRVPRQA
ATFSPPQQSLMM
AVRPAPL
AYQRFDDVASRF
CPLPYPLCLPHG
DDHSTRCWVS
DHDRSWF
DKWAVRW
DNPRGFS
DQQTSEF
DSHKDLK
DTTIANC
DYQFKSSPLRET
EELFTRNVLNWP
EHLDFLDSENTT
ELRGDMAAL
EPSPLKGDVIRT
ERVLPRV
ETYAGNG
FAVNPSKPAYFK
FGPNLTGRW
FIADPERYWCSVPAL
FLVMSQR
FPMFNHWEQWPP
FRPPMMD
FTDIRL
FWNTEML
GAYDVNVND
GFKVEANYNAWREWVRSDWV
GGSGDSRPPILG
GIRRTPT
GLNVMRY
GNWMDFHLQRTA
GPRPHLM
GQKAHPA
GRQSYDDSG
GSMCPYVRWYTP
GTTIKNI
GWLDDMWKG
HAPQLRH
HFAFPSW
HHNVHLLTSGNQ
HKMIPNHVLWRP
HLQSSYQ
HNNWSTHVVTLT
HPMKQYRWRPSI
HQLTKTL
HSKLNNRHHALL
HSWIMHT
HVDGSLR
HYKASLM
IFSFPSW
ILELQG
IPLNYNV
IRRNPS
ITWSEHP
KCCYIPT
KGKKALQSA
KIVRLTDAGHRTRRQPRTEEMWKVSTWLLN
KLTTNPSSPLNY
KPAYTHEYRWLA
KPWWRTNTA
KSGFNEVWP
KTRENSY
KWWMASR
LASSHAN
LEFSDLEDFFRA
LGQHPDH
LINEATGPAFVES
LLGSNWL
LNRADIL
LPMKYQA
LPTPHHV
LREQPQQ
LSFEYYI
LSSAQDR
LTPLNDP
LVLQEG
LYTSSDLWKL
MDMRTTDIRDTS
MHRAHQM
MMELGRV
MPWAHRAPQGIA
MSLPLLP
MTSAQTSEKLKAETDRHTAE
NAISWFPMHLAH
NETTVREY
NHFLPPR
NITQKS
NLRRTSIRAFYMLGPSRWMP
NNKMSSEMMSIV
NPLHAASTIWWF
NPVIRYASRSHSG
NSDPWV
NTHMTAF
NWEKQIGWPSAS
PASHQPL
PFMA
PIDERPM
PLKYWIQVNM
PNKDVAH
PPQKGGR
PRGYWLRIEW
PSMSHHQ
PTPTGRY
PWWEDNWYS
QDFRWLLT
QGLPFHAALRLL
QITTLGG
QLSPESDYDDHGMRY
QPASNMTLGRGL
QQLHLEA
QSKYPLD
QTMDRWASLRWS
QWQAPA
RATPEPG
RETLPSLYL
RGDLPPY
RGWRGEKIGN
RKGQGG
RLLSWSQILTLSDST
RNVPPML
RQR
RRWCRSPNNLFIASPHGPLR
RSSHSS
RTYGWWVV
RWWDDF
SAKPALA
SCVGGHS
SEKWSKV
SFTYHVP
SGWSHLYWWTHD
SHRLLQTYWSSA
SILSTMSPHGAT
SKTFPVR
SLNLHLPLHPTF
SLTVPFLPLYVP
SMYGSYN
SPAPSDS
SPLSEHS
SPSWEST
SQSYPDR
SRRTLMSGA
SSLWTRYAWPSMPSY
SSYISNFG
STLPSMGPSNFF
SVFSFRL
SWDHMPY
SWWPFPPQPDPA
TAFRNSLG
TDLMHCSGFALSPGCPQ
TFINPSH
TGSSWAP
THSWTSGKIPLR
TKTWQSM
TLRGERN
TMTRNFM
TPFLDKWVALKP
TPRQSPI
TQNSNSTQYGNR
TRTNPWPAL
TSPLNIHNGQKL
TTGMTPH
TTYSRFP
TWWGFPA
VASPERPSPAFP
VFTEER
VHQKNPF
VLTVIH
VPGHHLM
VPWRDWT
VRVAR
VSYSELTSYYMR
VWMPSWA
WDKRPVVWLRFEESQRLSRCATCGVGGVE
WGRTMR
WHVPRTWWVLPP
WLHPLSYTEAYR
WPMNDDSTRPR
WRTHTWA
WTPSPAT
WYGRRW
YEGSEVS
YHLSSQQLDHSL
YLPEVIS
YPFGVWT
YQRPFNP
YSLRQDVLVLEE
YTTWPFTSLQLD
AADNTSG
Negative sub-dataset 5
AAPSHEHRHSRQ
AEGGVRG
AGCTALSAVDDVPGC
AHLRQDSAWKLN
AKNYLLYPPIRQ
ALVFESY
APGYARLPSLMS
APSAMS
ARASE
ASLMLLGGTSGPVTH
ATIHDAFYSAPE
AVTNATQ
AYTSAHK
CREGWCGDGL
DDSWK
DHLMHQR
DLETSFMPA
DNVHTTLSQPST
DQSYPADAN
DSMNTDDSTRPR
DTTNSHL
DYVSDVCRDGGRIML
EFAQ
EHPHVPITPSNL
ELTAILVSPAPL
EPYGFIAFSRAAHSP
ESAQRPFGC
EVIGWSRLF
FCVCFCGCTIMVLLL
FGSHASE
FINPTWA
FMGHHMVEPWDV
FPRWKLLAHWADRWWF
FRTAISGTPQFY
FTKTTSP
FYESCENSDPGRTYA
GCRGDCV
GFRGDG
GGTTTPRTT
GKDRSIQ
GLRLEST
GPASGPM
GPRPNLT
GQPLIAHSTKLL
GRRGSAG
GSPNFTQ
GVAVTT
GWRNLEGGSV
HARGDFSWLMPE
HFKHQHSYARPP
HHRIQTL
HKRPRNN
HLSICDSKLICH
HNQDFHE
HPPDYNVIYRTP
HQQQQDNSSYRQ
HSLHSRL
HSYGPFVV
HVLAMVVGFLGVEWF
HYPWFKARLYPL
IGGPWRRGF
ILKRLREQHRHHHAAAHHVRVRRRGRH
IPMKGHW
IRVRTW
IVKNVPLTPLRE
KDGLFLGSWL
KGPRQIT
KKRTND
KLWNLHPTQALW
KPGDPRS
KQASNLIVMHYP
KSLENYY
KTTAHLNFYNNI
KYLNAHV
LATPPKP
LENANRK
LGSGRGF
LISHSI
LLNFSPY
LNSTVSFLQRSP
LPNPISPRWWVG
LPWHKHR
LRHPTLP
LSHA
LSSTSNT
LTPTVRSGYLNH
LVPWGRL
MADPRYW
MDTPRHLMAYLITQR
MHSDMHAPVSDI
MNKSHSA
MQGHELGFMKI
MSPHHMHHSHGHG
MTSTAPL
NALKPQGLHSWY
NFFTEPL
NHHAMFW
NKDECR
NLSRHTYSHPHM
NNPMHQN
NPMHSRT
NQEPGNYASTYR
NSGLHMF
NTLGTFSLYDALG
NWLPTWE
PATSHQV
PFSSSPS
PINLHG
PLPISPR
PNNLASL
PPRPP
PRLLHL
PSPISQT
PTRMGPG
PWYFWP
QDMIRTSALMLQ
QGRIPTS
QKHYYESYP
QLTMRLQ
QPHHYFK
QQPPMHLMSYAG
QSLSVPR
QTPLTMAALELF
QWTITYPKPPAL
RCITAR
RFGSHVP
RGDLYVG
RHFVPLYLSVSYDGFSRGASI
RKKNTNN
RLPMVEP
RPFPR
RRDTISPYS
RSATRD
RSTGIHVIHHMRS
RVFFVIFLSDLIWPF
RWWQHRPSHTPS
SALNPWDEYLEL
SDIDLLSQV
SEPVDHGL
SFYEPSW
SHARGDLVGLTP
SHRQSRV
SIPSVAQSRSAT
SLAPRFPWLNPLDGW
SLPDPIH
SLWDWRGRL
SNERHAM
SPDDSST
SPMFTMIQGDAQ
SPTPFLL
SQTPKSK
SRTWVLWIRY
SSMRQMH
STAPRPY
STNPPTQ
SVHMINTSQVHL
SWFDNFLYPTHD
SYAAVAS
TALMSAS
TDNSARP
TFPQNVPLPILP
TGYHNNT
THWTRAD
TLDDSST
TLSPKLH
TNGLRTA
TPHHYMH
TPSLPPTMFRLT
TQQPLEGHQLPY
TRWGESDSFRISPPG
TSPYEDWQTYLM
TTHQFPF
TVFNEPF
TYAQLQPTPSLR
VCCLAGL
VFYYNWV
VIARSN
VMAQTNLFSPRS
VPHLPRHPLSSY
VQASNSN
VSAAPYP
VTGAVWMVLEESSHVLL
VWSWALRKWV
WDPLLPPFPPPN
WGSNPPSATAPP
WHWNAWNWSSQQ
WLQDITL
WPRLLFDASANH
WSDPQPQKPAQR
WTRSDHRIQ
WYPVSWTKNLWYGPK
YEPGPAWRFHRE
YHSFNGT
YLQSNTEPKQDS
YPHFHKHTLRGH
YQSYV
YSPVTYTKYRLP
YVELIFV
AAHYRVGPW
Negative sub-dataset 6
AASGRLVDVYNSCVS
AEMAAPTGLQVK
AGGFGEQ
AHPNTRLIQPSD
AKTRTAK
ALWGPTS
APHWKHKREPPT
APSYSP
ARGDGLLFHLSG
ASNHTHSSSIQF
ATPEWPP
AVYFHM
CAGGLTCSV
CSAYALDALLPR
DEKRGPNE
DHPVPWR
DLLAVSWLRA
DPFTRMSIKPTG
DQYVLTFPWTPR
DSPLNYTYTYRQ
DVELRPL
EAFRSSDQ
EFGLSEV
EHSLTFW
ELYVSRL
EQFYPNW
ESHRQRRAK
EVSHPKVG
FDFWITP
FGVR
FKASLLH
FMTRGD
FPTRTNN
FSAYRIG
FTPQMVR
FYRFVGDHKQLY
GDGGHRP
GFWHTSK
GGWHKHISRSDP
GKIHFFR
GLSIWN
GPEDTSRAPENQQKTFHRRW
GPRPPLPPALPL
GQSFRWRLR
GRRSVLT
GSSFSSGFVNWHRFAA
GVGLPHT
GWVIDYDYYPMR
HASPGQG
HFSSNNKLSPSN
HHTHQASFMTRL
HKTLGF
HLTSMQM
HNTVPSLWYHNR
HPPPGLFPP
HQSVNKE
HSLRPEWRMPGP
HTALAPS
HVNTSVGMLRHP
HYTRHSA
IGLSEHF
ILPVHVS
IPPNPSQ
ISKHTPLRTRPR
IVNWNLTAPGPRFES
KDLFSWQLI
KGTINPF
KKVRVVR
KLWTIPM
KPHTPHNHPSHH
KQMGTLK
KSMEADT
KVDNPNH
KYTESYN
LAVTRPSPNKYATVNKSAQA
LERLPP
LGTLNAGVPGFP
LKAHLPPSRLPS
LLPGQTTLATGL
LP
LPPLNYY
LPWWPQASISPP
LRKRRENTK
LSIRSYTSPQWQ
LSTLRST
LTRPPWG
LVSERL
MAGVFLGALG
MEPKSRY
MHTNYCRTCFLS
MNPSQSS
MQLPPDT
MSQDGHT
MTTYPLS
NANPWSRGF
NFRPVTAMPRLD
NHLRKA
NKIHFYP
NLTLDPC
NNSHMPL
NPPLYPAAQTYE
NQLPQYMGPAPAYMR
NSKKIPT
NTNPAWRHYKAF
NWTDKT
PDANNGN
PGARNAQ
PISTDQQ
PLQFRG
PNSIITH
PPSRHEL
PRPALSTGPGRF
PSRLSSQ
PTSQQKV
PYGAALH
QDRGILVEPPRM
QHAPSNSKSVLT
QKLSMPV
QLVTDEL
QPHTLSMHRHYY
QQSPLWH
QSNYPRASYVFQ
QTSAMRH
QYEHWSEGLT
RDFQYLWNRVSQ
RFLLPQG
RGDSFDTRYAPL
RHLLLVDRLRAIALLL
RKLPDAPGMHTW
RLRASWV
RPLPRSKRNISR
RRGDIGPRFESAIVD
RSDRGKAHPSRRS
RSVHASHHHIMRS
RVIVGPR
RWWWQDT
SAPFSPA
SDLVSSRML
SEVRASERTAHYEH
SGEQYRI
SHEIYVGSDGFR
SHSNTTQTRPSD
SISAMPAPANSS
SLDKWVLAPLAY
SLPLVYS
SLYELR
SNHPATLTGTGG
SPFFWEL
SPNQLKL
SPVEALLTHRLH
SQWLQGS
SSAFYPK
SSPDRALAATPF
STAVQQFQNTLS
STPLVTGTNNLM
SVLRQAAQFGNFELYVRREGNCRALTGCMR
SWGPLPF
SYFDYLYPPRPA
TAPASMSDDRAS
TDRSPRGVMRHA
TFSVDYKYLM
THEPSGR
TIEFRHRLL
TLFDVFR
TLSVNSNYGAFT
TNLDDSYPLHHL
TPHRLAA
TPSSRGA
TQSFIRQ
TSASTRPELHYP
TSRAEASITRVF
TTKRTPR
TVKHRPDALHPQ
TYLMP
VCRLMRGRCLLYSVF
VGFRLGL
VISNHRESSRPL
VMHKPAR
VPKKNRT
VQETQRP
VSDVYQLTERLR
VTKSLRVFG
VYHVST
WDYKELDDWTMY
WGWRYAET
WHWRAFF
WLVCRHSKRYNCIFL
WPTFIPR
WSGQDI
WTWPSWA
YAFTPPP
YETKTHS
YHWDPLP
YLTMTPT
YPLHLNTDYSTR
YRDFRDIWA
YSSVHID
YVHSTQPLTPQN
AALVRHT
Negative sub-dataset 7
AATPRAYAPAS
AEPIIYW
AGHDRLAVTPSS
AHRHPISFLSTL
ALASKTD
AMKTHTAIAPRA
APKQTQH
APTWWKS
ARLGHF
ASPPSYALPVTP
ATPTTPDP
AWLLRW
CDDWPHE
CTAWWCDQW
DFGERTKHNLWV
DHTFMQRYHTHQ
DLNTYPTLSKRE
DPHYRNSPKPDS
DRGDTY
DSRWQTL
DVGLVST
EAGPRSSP
EFLQWSGK
EHYP
EMPWSTNSFTDD
EQPYLHV
ESNKPWY
EWGCETMRQLCCLPL
FDLSEALVPPHR
FHDTSLLSHHLA
FKMPLIS
FNEHHRVHSVTR
FPWGDWP
FSFPPWS
FTSQAPT
GAASTRY
GDNSHVNL
GGFELI
GHFSYPYARQTP
GKPGWLLDNVAL
GLWAGLF
GPGAWWGSA
GPRPPSTHWMQQ
GQWLGNWL
GRSPGSHMA
GSSRAQMTSHRP
GVIHWRAWGGDW
GWYWETPLDMFN
HATSYFV
HFWNRPL
HHWHHWCMPHKT
HLASGHSIHYRT
HLWSFALPSAQV
HNWTRWLLHPDR
HPRIHHS
HRDILRGTA
HSNLPTKRPTSL
HTHWFHT
HVSIHRTTHHEM
IAGLATPGWSHWLAL
IGRIVHHSLYSWPS
ILWLLLW
IPSEMR
ISPAPHLLTSRF
IVTARARHDWNWVQRSSRSL
KDPALLTRSPPSARM
KHDPLPYPHFLL
KLGDPKIATTLF
KLYWADGEFT
KPLFHNT
KQRDSRSGYTAPTLV
KSPENSS
KVGLRT
LAANLTQ
LCLIVCRRRLLVRVCF
LESSLDRWTTLA
LGYPWMQ
LKLHFNT
LLRGDMS
LPAPPFR
LPPPSYWSQ
LPYSHKFMIHSKPTF
LRNCEQDFFTLN
LSLAAHF
LSVTYCFVY
LTSGMTQ
LVSTPLP
MALEGKV
MFDFRERML
MILDLK
MNTLRY
MQPSLVH
MSSPGVA
MVFMEGNGRSFYYKL
NAQNHSQ
NFWWED
NHNTSTWAAYST
NKMPGAS
NLWYREEWR
NNTTPPS
NPPRT
NQPYHWL
NSLYPPQ
NTPSPYPMSSAP
NYFVET
PDLYIN
PGHHTSQ
PKGVYS
PLSDKAH
PPDLFWY
PPTTMHA
PRPPF
PSSMPSR
PTWYPKS
PYKQ
QDTGLLA
QHGKPGSIPLQG
QKRPVNISTLQELWE
QMANSVMPLSWT
QPLLKLP
QRGRKA
QSQHTDPQYLYL
QTTKLHIMDTGF
QYNPLPY
RDHFSTH
RFPVSYTQSYRT
RGDVPAASARGSVSIRDLWR
RHRTLF
RKPPNPPPP
RLTPESDDR
RPNKKNA
RRHWHPPVQI
RSGGVSELRAEGVNRRQARRKEQRRQPPRY
RTAKRKWKHTRD
RVPETGWVK
RWYSPI
SAPRQAD
SDPAQAVGRMRP
SFAPQFA
SGHHSLR
SHGPQGY
SHTAAHHFQVML
SISWASQPPYSL
SLERRPM
SLPTLTSILWGKESV
SMCSLKTACTTA
SNLEDS
SPGNFSLADALL
SPPEETP
SPWYMTPSPNTA
SRAPRFPWLNPLDGW
SSAWWSYWPPVA
SSPNTTQ
STDSQML
STQAMFQ
SVPSSEV
SWKYWFGE
SYLRDLW
TAQNNHA
TDTTHPY
TFVSMPP
THKFPWI
TIKTNLQ
TLGTPWS
TLTTKLY
TNPATTQ
TPIRHRS
TPTGQIGPPMRE
TQWIIPSKLAIKTPS
TSFTGWWNLMAR
TSSDLWKLLP
TTLQFTGQTNKT
TVLTNPSTNHLS
TYPIPFR
VDLPEHRQ
VGKKLP
VKTLHSGPGLSF
VMRPVTA
VPLQPLR
VQQKSSMVGPLL
VSGHPEF
VTSALHQRLNISHIF
VYPQNKHHTWYS
WENPYPE
WHEAQPSPGLLR
WHWSPRTALYTT
WMKPIW
WPWHKHS
WSKSLVS
WVFSPSTGGHRLYTGPGRHF
YALHSTP
YFDPGFCVFTSDHLA
YIHAPAP
YMDTQTTLPIMW
YPNDFEWWEYYF
YRHHAHGGRG
YSWHHSP
YVQPSWL
AAPLGTHPSMHP
Negative sub-dataset 8
AAYNATRGTVSA
AETHVLNKHTPL
AGLRLKKAAIHR
AHSMGTG
ALHHHASRDAPE
AMYYPLWPSLVY
APLLSSK
APWHFTRVPALV
ARLYSRGA
ASRQDMQNLAPP
ATRYDDIWASTA
AWQVHYSYVASS
CESSLCLMYSLGPPA
CVSWLGFAWEWLQLLG
DFRDYSTRPFAL
DHVNTFW
DLRIAAS
DPLNKMLLSQDL
DRIVWW
DSSSMLHWTYSL
DVSQWGEAL
EANYNAWREWVRSDWVS
EFRLPQL
EIVKSSS
ENEKLAY
EQTQTLQ
ESRQLYPGFQAF
EWTESMM
FDTPHTLTWFHG
FHFYAF
FKRPP
FNLPLPSRPLLR
FPWMQSYGVGIN
FSLGLIK
FTTSLFDRDFCS
GAFHKHHHARLI
GDRPSPS
GGGQDWRR
GHKVKRPKG
GKQPASD
GMDGTQLDRW
GPHFELR
GPRPTSS
GRGDGDV
GRVNG
GSVPLSRRKEVWAGEEESFGYWLVNWQEMM
GVLRGVS
GYLAHSA
HCAAPASRQ
HGKAALA
HHYDTYWVWTTS
HLGLMAMDHLPW
HMGMTKINYSAL
HNYRIWNHWWLS
HPSDPRH
HRLAFGQYT
HSPLTSS
HTLLKSQ
HWEYRVRTYPQT
IARIRV
IHLDHGTVAPIW
IMFQSA
IPTHPRL
ISRRGDLSGLSFSRL
IWFTFQD
KDWGRI
KHLNFLEGRPTF
KLIHNNS
KMGGTNHPE
KPMVRPLVN
KQYASPW
KSPVHGQ
KVPWISW
LAHPPQT
LDFRGSLLV
LEYDPHHVARV
LHFPLDYPQALG
LKPGPAS
LLTVERA
LPFNLTDALPWW
LPPSIPFGLTVG
LQDHSPF
LRQGNPT
LSLNQSSALTRL
LTAWGWA
LTTKQHNALPRG
LVVSAGG
MAPYPLQ
MGAMARV
MKLPVDENKSGRRERRQPTPAGERELIRFD
MPDHALRPQYSI
MQTFPVS
MSWPPRT
MVRPSNWDALTR
NATMSAS
NGGQVALSPDWL
NHQQQNPHQPPM
NKPRVMPLD
NMDTARL
NNYFFV
NPQAYVWEKKLR
NQSPHSTYTLKP
NSPKGKP
NTRLPMP
NYPEDFFQRTWP
PDVPHPA
PGPTGIDLWGAEV
PKLLGPG
PLSNPQH
PPGLSPLIR
PPWDFDAGEGIH
PRSENGV
PSTPGDNPLV
PVKPQSP
PYRH
QEKIRVRLSA
QHNHSKQ
QLCIFHNEWNPV
QMMLTLLWAFWY
QPNDLQL
QRLSFPI
QSRRSL
QTYRPSY
QYYGWYYDH
RDKEGNIAS
RFYYLH
RGGASPT
RHVAAAVFVGWAFSV
RKRSSADPL
RMNTKH
RPPMFDS
RRKR
RSHELHTHARSRS
RTEVPVLSFTSPLTG
RVPSGSQ
RYLPW
SARLPAR
SDRISGTSPTRL
SFGTHWSDLLSH
SGLDLWT
SHHTQSFMQKTQ
SHTQPYL
SIWQTSGVLISY
SLGAAQVVLPRT
SLRGDGSSV
SMHHHHRPASPT
SNNDLSPLQTSH
SPHHYPH
SPPSAML
SPYRSLS
SRGDGFR
SSFFYSALTPSFPSPYSQSSR
SSQYAHL
STFTHPR
STSH
SVRSPHLFPVMR
SWLPHNA
SYPKLPWSFIKQLNK
TARSVWI
TEALHYTWEHKK
TGDVSNNPNVTL
THLMSPI
TIRGDQ
TLHVSENSWTYN
TLVPSRS
TNQPRSF
TPLHPKSLMVWH
TPTQSPGPGSRP
TRDSFN
TSHHDSHGDHHV
TSSRRLIRLMRRTQY
TTNDFTR
TVPKATT
TYPWVTQ
VDLPTHTS
VGLSIHI
VLENSM
VNDASKLFYPRS
VPMQTRL
VRAPLLGPR
VSLEHQN
VTYAQLQAYFPD
WAANPSM
WFAPHLR
WHKPFRF
WHWTWLSDYPPP
WNDTWSKPPPIP
WQEWDGWE
WSMELLG
WVTTSNQW
YAPLSRL
YGASDGPNA
YISPLPNAATIS
YMTGSKP
YPRETAIQLW
YRPPAYANA
YTDNSLGTSVGK
YVVPQSPVRADS
AARNSP
Negative sub-dataset 9
ACLMCLT
AEYGESVLI
AGPRPNPS
AHVELMM
ALLPFKDHLPYP
ANILAIHHPRHP
APLQPRSDNPFR
APYNTLA
ARPFFGMFEG
ASSLNIA
ATTMHWSDQLEA
AWWADV
CGLSLK
CYRMPTCMQRD
DFRSRLLRV
DIFGRD
DLSPRLTIKPQR
DPNTSNF
DRNTMVI
DSTKSTNS
DWDTRGLWVA
EARVLACLF
EGFGSGGAI
EKPWWAVR
ENHYPLHAAHRI
ERARGA
ESWTNSWAHYFG
EYPDPPAWHLWF
FEKYYYW
FHKYPRPVAMTF
FLFGLFFFTCRS
FNPQKFWDPYLD
FQINPTQ
FSMRIPI
FTYMPPV
GAGQVERLREAKDPCRTCGGSRWRGEPFWM
GDYTLF
GGHILEV
GHNQFNPFTFVM
GKYFTAAPAS
GMLPPQLFDRHH
GPLAKFP
GPSAPRV
GRHRTSVPTDEVFIT
GRWLLGG
GTATSPH
GVPAGST
GYSDHFFGSRQK
HDIIERVLPKMP
HGPDVNHADPGRYFD
HIHRGEHGPSAR
HLHNYRL
HMRKRTKIKKIR
HPERATL
HPSTHRY
HRPPHHW
HSPVLKTPSTHA
HTNLPQALWGMQ
HWKHEMYPRTRL
ICTFQDLLVVQTVSD
IHPVPWR
INAKMLPNHFLT
IPYTHAHADHTL
ISTRSAIW
IYSNTSAPHLII
KEHASVH
KHNWPPP
KLLNSDALPVVA
KMRAIKPTE
KPPLHNHHHSLP
KRGDLP
KSTENSY
KVVKIEPLGVAPTKAKR
LAKSPSNSAREW
LDKKTTS
LFMPATP
LHKLVRHGRW
LKTLMTAPAT
LMEPCYAWGCTGPK
LPGFSVS
LPQNVWLHGWHT
LQIPPLL
LRSAGPS
LSNMPRY
LTGGTGYSHDFR
LTVPPAL
LWAAFPPQASVA
MASPLFS
MGLPLGK
MKTASVRHP
MPGRGGV
MRIIHIAVL
MTARTTS
MWGMHWAGEW
NCPLNYTYTYRQ
NGNRSPTTLMGP
NHSTRLL
NKTKQNPNL
NMMKYISPPIFL
NPDDSSM
NPRPI
NQTWQQLWD
NSQRYK
NTSSTPH
NYTSTIMHRGYR
PEHTHQM
PGSQRAL
PKRGDL
PLTGTSK
PPIPLG
PQELHPN
PRTRR
PSWMS
PVQKKH
QACQNNDTCPRL
QEYNRER
QHRMASMSPTLP
QLGGPSH
QMWAPQWGPD
QPPHQWGPPSRG
QRNQTQD
QSTCLSHPLLCLSWN
QVLPHPTKAEHF
RADYHAY
RDNAGLVRQ
RGDAWL
RGGRGPR
RIGHGRQIRKPL
RKTALGTRQ
RNAPYPN
RPQTLA
RRMLRARLL
RSKNPAN
RTKKTGS
RVRPARYLG
RYRTSL
SASGTPS
SDSSTLN
SFHPPSM
SGMWSHYGIWMG
SHKQDPLPWPRF
SHVPNAF
SKHDFPG
SLHHNKI
SLRTAAA
SMLPPPYPLP
SNPTSST
SPHTTPMQMLAH
SPQLAPF
SQGRLGQ
SRGFYVQQMHISLES
SSGFRDAFRGWDGSA
SSSCAKWAWSHC
STGYVHSTTNFK
STSVLYN
SVSPLYAYDDPL
SWMPDSKVFASH
SYQMDYA
TASNNNS
TEGERAG
TGHQSPGAYAAH
THNHQVPLAIIS
TKCQKMA
TLLLLAFVHTRH
TLWTSTRFPIPWSLL
TNSFNDSGSAPH
TPLTPNGLTRSG
TPVALQAKNSAP
TRGDHFMPPWWG
TSIMFRY
TSTPFRI
TTPRFIL
TVTFAPLRMWHP
TYSNSYP
VDYHYEGAIT
VGRHLA
VLGPYPL
VNMGNYRQQQPL
VPPTRPATSTQL
VRGWGGH
VSMKLEDKPRTALFDLWQAT
VVGTANT
WALFGES
WFNPPPYPG
WHLPWLE
WHYPPPYDLMRT
WNRSPLPDYGAA
WQLHYEPFSVNP
WSPSKLYSARDH
WWDTRGLWVWTI
YAQYGVKYKTET
YGGGGRS
YKDPTRGTD
YNEPWWLTPSMF
YPSKLNN
YRSVEW
YTFTQDN
YWALHHSGWPFSRGS
AASWNGR
Negative sub-dataset 10
ADGTSKVRL
AFDCPSSVARSPGEWSS
AGRGDSLGNYRNFNS
AILIISLMLGFT
ALNWASKSSGRY
ANLSQVL
APNHIPRPPGLT
AQFQHH
ARSLFGVD
ASSYRTSR
ATYSPDR
AWYSLTW
CHPLTPWEC
DAGDSAYSQ
DFVG
DISGPLA
DLVSGYG
DPRATTTT
DRQTWQNFMLIP
DSYCELTDPGRWISA
DWRGRLS
EAVPLRS
EGKGVEAVGDGR
ELASVY
ENWWGDV
ERFSDLMKLA
ETGAKPH
EYTNDYDDPGRTLSG
FEYWTDS
FHNHGIL
FLHTRLFVSDWYHTP
FNRTWIG
FQTPPQL
FSPLNWPSAT
FVFPSFH
GALHQEPSSNLF
GELDHWSGLPPH
GGIACTKWSPQG
GHSLCSCIP
GLDPRARLL
GMSLLHGQRPHT
GPLPSNHSFQHP
GPSVYSI
GRKSAVSPA
GSADRGR
GTGLVPLFDPRYRFL
GVRTNLL
GYWPIDHKRVPLSRLV
HDSQLEALIKFM
HGSTKWA
HIPYDPP
HLLNGKP
HMSPRHQS
HPGSSSR
HPTPTDI
HRVPGHGWVR
HSSHTHQ
HTPTNHKWPYNS
HWRHNHS
IDLLHHK
IHYCAPAGFAILKCNNK
INLGLTM
IQPQQYWDPFRY
ITAARLP
KAAQIYSEP
KEPYTTE
KHVPKMH
KLLYYVS
KMTPYPL
KPQDSRT
KRLNSGR
KSYEWPGTW
KVWIPQK
LANFTPH
LDNALDR
LFYYLH
LHMDKKR
LLADATHHSPWP
LMNSPRQLMTRKMSH
LPHLDKWSSITP
LPSAGKA
LQPHHCY
LRSGTG
LSPISLQ
LTIPTTA
LTWRMRS
LWGLDS
MATPRNS
MGQPISP
MLDPRWE
MPKHIHRPHNIN
MRLPMHD
MTGRLISWWWSL
MWRWESCCWE
NDIRGRLLT
NGRSRF
NHVTAIKLITHI
NKWPLAHSQKKR
NMRLLANPAMAG
NPFNHSG
NPTATPL
NRLGSTG
NSSQLAPYTTHR
NVDGAVS
PAAFAFL
PERCWM
PGYSRAT
PKSSGAL
PLYSDLLKLL
PPLPF
PQLVPS
PSALGRFTRGPL
PTAPNHS
PVSKLSRASGVG
QAHTVGK
QFIPDKWARSPN
QHSTLPSPGPSL
QLLFPSSPRAPAPWTFTF
QNIYAGVPMISF
QPQVPDA
QRSDLASLKLTL
QSWWQQPFDPMD
QVPRSPY
RAIHLDG
RDRLPP
RGDFWQ
RGLMGRR
RIKRW
RLATKA
RNDSGLVVQ
RPTKNFEAEVVRSTGPMHHHDTAKQRY
RRPPAYEGWHNV
RSLSM
RTPNHNT
RVVCEYVFGRGAVCS
RYYPYFP
SATMGRVPTTAS
SDTSVNWLTLWY
SFLPPWM
SGPRTLP
SHLLKPQTRTRT
SHWIRYFPWSIG
SKKDNAVGLQELRLREGHRHHHDVMLT
SLIPRGARTPRQCRSACPPREYSSADHWKS
SLSLTRH
SMPHLTS
SNRPVEYTHVYR
SPKASRS
SPQTDGLVSTPS
SQLGVKYHMPGS
SRKKTFTGA
SSHSNLQ
SSSPSGG
STHHSTP
STTPSRM
SVSVGMKPSPRK
SWPFDKWSQSLS
SYSNWTP
TATRLHL
TELLVVT
TGLPTTNKQTSS
THQCLGKLQCGV
TKKKSSS
TLNWPPTLWGMH
TMDLIPEHYM
TNTHWSYMLPSA
TPNSDALLTPAL
TQDLGYSRV
TRGYLERRL
TSLHPHP
TSTVTHV
TTQVLSGTLPQH
TVWTSEH
TYWEDTLYAARV
VEGRNSK
VGVLLPA
VLLAVWSVFHERSWL
VNPVNTH
VPRRWDV
VRLDHGVWGSRLSLP
VSPLSFGSPRYP
VVLRFGG
WAPEKDYMQLMK
WGANPGL
WHPGLSFGSYLWSKT
WIVNSP
WNYTISERATRD
WQPNTRP
WSSNLRVLPWSP
WWHPKIPSPSAR
YATQPQR
YGLPHKF
YKLDKWAPSLSK
YNLGQLEAQITS
YPTSNIIPSIWS
YSCDAYVGVRGVLCI
YTKASIFTVQPM
YWLPPWS
AAVERSKMIDRNLRE
