# Supplementary material for: SABinder: A Web Service for Predicting Streptavidin-Binding Peptides
Source: Biomed Res Int. 2016 Aug 17;2016:9175143. doi: 10.1155/2016/9175143 (PMC5005764; doi:10.1155/2016/9175143)
Supplement: Supplementary file 1 — Supplementary Material A: All peptides in the positive dataset and the negative dataset are provided. Supplementary Material B: All peptides in the NDFT and SAART independent testing datasets are provided. Supplementary Material C: Performances of each submodel are provided in Table S1. Results of each submodel trained with various machine learning methods are provided in Table S2. [file 9175143.f1.zip › Supplementary material B.xls]

## Sheet: NDFT
AAANVWH
AAARSTGETSAH
AADNAKTKSFPV
AAFGSNRVELFM
AAFTPRPWPSTV
AAGNRLP
AAGVGVN
AAHMQRFPLLHQ
AAHYGYEW
AAIMHQEQESNT
AAKGTPW
AAKLLPH
AALERSKAIEKNLKE
AALGTYSTHTPT
AALHHHHHDAGRASAMRRPGTPATSWR
AAMPIIP
AAMTNHVLDKWA
AAMVG
AANMNMSRVSHT
AAPAGVLHIRHLVGPNRYNF
AAPHPAT
AAPLWAS
AAPMALF
AAPMQVT
AAQTSTP
AARHPTMHPSSS
AARMPGL
AARPPQT
AARRPFPAPS
AARTLSFHPYGYPPY
AASNEFLGAGRLNFDKPKHS
AASPHYSSSHSH
AASPTQSMSQAP
AATDHQPEAKCKLA
AATLPSIDW
AATNLGI
AATPSEG
AATVISR
AAVASMLRHLAGLFVL
AAWHLIVALAPN
AAWHTGKAEGNG
AAWYRTSR
AAYTHAR
ACCTFKNVTTKP
ACDQMECYPPLV
ACDRYV
ACFGGEG
ACGSAGTCSPHLRRP
ACGYTYHPPCARLTV
ACPYKGP
ACSDRFLRRPMCLPPHVVFL
ADAITIG
ADCTTPT
ADGLLLGKWY
ADGRAV
ADGRRLG
ADHVSHG
ADLAMSKWR
ADLMTKAMH
ADNANVSTLHPT
ADPFSPTNRIPL
ADPLPLY
ADPNSVRAH
ADPNSVRAM
ADPQFSGHTPPQ
ADQNSFISALFQ
ADRSALF
ADRSPLW
ADRTRGRIRGNC
ADSPAKAKAHAIF
ADSWGLDLR
ADVMGPLVTAAE
ADVMGPLVTAGE
ADVSQPV
ADWRERLVL
ADWYMFVYGS
ADYLSRWGSIRN
ADYRSRLTW
ADYWRGWKERYNRSL
AEAHYKHSCRQDFCPTL
AEASVRSYLHKRLEHPL
AEEKHWLYSPCLVHCP
AEEKHWLYVPDWTTAP
AEFAFNF
AEFSFSVTKW
AEFSKKTSEAFPVWRLM
AEFYRPSLLTAWYSNMP
AEGGRVY
AEGPPNE
AEHMIWMSPGRA
AEHYTFPKHSVWDIPYI
AEKLRY
AEKNIVTYIPRGDMPTM
AELFSTHYLAFKEDYSQ
AELTGYEDVRRVEKRKGLAGTRERRQPAAY
AENITTK
AENRFDADLRSSALA
AEPAAARWQASL
AEPDATGWRSLG
AEPFPSPKGSLK
AEPFYSWDRASR
AEPGLAISCKRDVCITS
AEPRGDWSTFRTHDTLF
AEPVAML
AERY
AESASFSCRSDYCITST
AESDDSSTRRH
AESTSSFKSPHH
AETHINQ
AETLLDQGGHAVQLGDV
AETQYPHPVCRGDCNMW
AETVESC
AETVESCLAKSH
AETVKVV
AEYGERGNA
AEYGESGNA
AEYGESVNA
AEYKHPRGDSPTHHQFG
AEYRPSPGPSAH
AEYSMYSAHRPR
AEYSSDLWKL
AFAKPLASDPLF
AFAQAPTHQLSL
AFDVRERLL
AFDWTFVPSLIL
AFFGPSW
AFGVVSD
AFHGPVH
AFHVRDRFL
AFHVTRM
AFIGPPW
AFLFSPLLAWPT
AFLRMASL
AFMETTSQNAWL
AFMTRG
AFNIRGDHWVPD
AFNMFDFGV
AFNPFPE
AFNRASD
AFPHAPMSIDHIFFT
AFPPGLRAP
AFPSVNS
AFRGDS
AFRMPSW
AFRVGVL
AFSNTHRMMPLK
AFSYHIH
AFTHEAPKRRDS
AFVSGADVNVCLHCA
AFYQGLP
AFYYLH
AGAGGGNVPVCS
AGALCY
AGALCYYRAK
AGALGGS
AGDFRSRLF
AGDLVTFKLRLH
AGDRPLPPLPYNPKS
AGELSPNRSAFL
AGETQQAM
AGFEKIP
AGGDWWW
AGGGLLM
AGGLIDV
AGGPRTAP
AGGRSVNPS
AGGSTWT
AGGTFKP
AGGVAGG
AGHQLIV
AGIFRH
AGISYTKTW
AGKASKIPDPGF
AGKGTPSLETTP
AGLHPRSLESLP
AGLPNHNAMLLT
AGMATSRSTSPL
AGMWRVPRAENYSAPVRTRPKRQPWAQGSY
AGPLRGFYMCSWCTP
AGPPYQSYP
AGPRDPYGV
AGPREPNL
AGPRPALG
AGPRPPH
AGPTRIS
AGPTWAH
AGPWWHQTSVHV
AGQGSQ
AGQTLTASGD
AGRAEWPLGIAPG
AGRRAQI
AGRTTQV
AGRWEHGTAEGD
AGSTASVTPAKH
AGTGDDIARMWR
AGTHTPGAT
AGTRMSWEVL
AGTVSGPGPHHP
AGTYWVNPI
AGVHHHHDAARGGTRSRRSTPRSATRR
AGWKTGEADGSS
AHDHRSSLKPTR
AHDPYPL
AHFAPGTAMYSD
AHFNGSLRSLTQ
AHFPPRSQMIAD
AHGYWEL
AHHALME
AHHLKQFW
AHHMSDR
AHHNSWKAKHHS
AHHPHAWRHSHKG
AHHSNLY
AHHTLLELWTQA
AHIPWLL
AHKSARKTE
AHKSDNWVFLPE
AHKSTLR
AHLELRSNNMYF
AHLPPAQ
AHLRAGRQ
AHLRPAPGDPWF
AHLSIIF
AHMQFRTSLTPH
AHNSAAD
AHNYYPREW
AHPALPL
AHPITQHDTSAR
AHPNTAPIHPKF
AHPPWPLQYVFR
AHPQLAT
AHPWWLG
AHQANFPSSSAI
AHQASFV
AHQDETLAFSARG
AHRDDSS
AHRPTLL
AHRSDFWRPFPT
AHRVSRI
AHSERWERFPQG
AHSGVLL
AHSGWSKPPPIP
AHSLKSITNHGL
AHSPVWWRQ
AHSSYGDRTKPT
AHSTGLSPSTLR
AHSTLMR
AHTHSKERVQTI
AHTPNSR
AHTTDPFQPWAL
AHVPFHH
AIAKKHKWN
AIAPFFA
AIARIR
AIETLIR
AIHSELMWVS
AIKRSA
AIMHHMV
AIMRSAQELGPPVES
AINLGHR
AIPRLEE
AIQRAFQELGPPVES
AIRAPWS
AIRDRPM
AIRIVIATNI
AIRQAWLELGPPVES
AISLTPR
AITRSPA
AIWPEPLPLPIG
AIWQHGV
AIWQKSW
AIWYPHV
AKAFSYWTPFDGKSLYSST
AKAPLDLPVDGF
AKCHSDVPSPAC
AKGHAETFSFSG
AKGNTAPATD
AKIHFHS
AKIHFLP
AKIHFPP
AKIHFYS
AKIPAGRDR
AKITRTLSLPFS
AKITSQRMM
AKKARM
AKLAHHIHHFHGG
AKLPANWHLMLP
AKLPIIP
AKLTSTFSESPH
AKPLASPRETGASQR
AKPSPFP
AKRAPL
AKSRSAGD
AKTLYPLYSSPI
AKTMVIFLRRRL
AKTPPSR
AKTVWDGRW
AKVAITI
AKVDPED
ALAAHKL
ALADSIWSSRSGPGL
ALAHNPKTTHHR
ALARAARLG
ALDDYKAGDRGI
ALDWRLRMG
ALEFRGRLL
ALFKPSM
ALFSNGR
ALGLSPL
ALGRLKHTSR
ALHMKLGPQYYP
ALHPLTNRHYAT
ALKTNQP
ALLADSR
ALLCDWAPADCS
ALLDPTV
ALLFAS
ALLPWTD
ALLRYNPFYYLSFSP
ALLSDLYKLL
ALLWEAPDQRLS
ALMIANS
ALNLGSR
ALNMAPH
ALPCNGAGCSRVTAR
ALPDTL
ALPEVLS
ALPLQDTAATLS
ALPSSTL
ALPSTSSQMPQL
ALPSTSSQMPQV
ALPSTSSQMQL
ALPTFGVISPFS
ALPTHMNWVMPV
ALQCQYKVPCLV
ALQPRYL
ALRDRPM
ALRGHPH
ALRNEKFWVV
ALRPPPH
ALRRGD
ALRRLET
ALSEDKWASTAS
ALSENKLRV
ALSIIGK
ALSLPLY
ALSLPQTTRALF
ALSMWQPT
ALSSDPH
ALSSQGGMSPEPTPL
ALSSSSNTTTRV
ALTGSTKSAFGG
ALTLHPQPLDHP
ALTPTPP
ALTPWAF
ALTPYPL
ALVNIPISNNLA
ALVNNSHTMPLW
ALVNSPLTRAPM
ALVNWHGVYNYR
ALVRHPGARLRSFTA
ALVSDRWSWMHQ
ALVSEAGCLVWAA
AMAGPDYKVADK
AMDLFT
AMGLKS
AMGYNKNNDSLL
AMIPYTWFSPSP
AMKHSPSNFKWD
AMKRVAR
AMLSPYDTNPWN
AMPIPHPPKPRT
AMPYAPR
AMRDYQSYP
AMRGDTYLHPTK
AMSAGV
AMTQWRATSNMG
ANDLAHWEPMSF
ANDPDKWNLTPL
ANFMKKKEP
ANFWGES
ANGCCD
ANGVPIPPHPARAAR
ANHTSPV
ANILSRR
ANITQSS
ANKDVRR
ANLDTRR
ANLFKAK
ANLHHQQ
ANLINEFDDLAS
ANLSSHSSPGDS
ANMSLLT
ANPGQNPYEKRE
ANPHTTLRNHVL
ANPPLPR
ANPSPSTHHLTP
ANSFWVNHPTIT
ANSKLSP
ANSLDNWFRIFP
ANSYSVNYTPSM
ANTLRSP
ANVQFML
ANYFLPPVLSSS
ANYFSSPIKHAT
APAHLHKPSHVR
APARMP
APASLYN
APATHLPAQ
APATSIG
APDDSST
APDWWNIWS
APEHSQLRHMDP
APEKSLIRNVHD
APERSPQ
APESMMIIDPGF
APFAHSGPLAFS
APFRLE
APFTHLR
APGDMLPPLPSL
APGGVVR
APGPSKS
APGRVPALLIPPWAW
APHHHHPHHLSR
APHHTNITEIRI
APHHYPM
APHKHHKPPVLM
APHLQHGHHPHR
APHRLTQ
APHWGQN
APHYPP
APIKLQAHGLWY
APIQAHPLGLIR
APIQDNTLGRWF
APKMNQH
APKNHVHHVHKS
APKPALT
APKYSLSDLYLN
APLAMR
APLEAV
APLESI
APLESNW
APLGMS
APLLRTSNTPSL
APLLTWPRAIGP
APLLVNQSLPHR
APLMRTTNVLPL
APLPEVL
APLPQPNKPHLF
APLPTNGE
APLPYDHHSAGS
APLQST
APLTLS
APLTSPMM
APLVRLP
APMHKALWVQPG
APMQLE
APNETRS
APNIKSTNIPHL
APNLRPQ
APNQEYFGPRHK
APNSHWT
APNYPP
APPDHAG
APPGHHHWHIHH
APPGLRLQS
APPHALS
APPLFTP
APPLSNL
APPPGKWEQ
APPPTHWKKQLY
APPSYHSSV
APPTRNQ
APPWIAV
APPYPP
APPYTAY
APQATV
APQHMIWPKPTA
APQIMTHNYNMT
APQLRPM
APQMHLP
APQNAKDHLPGY
APQPWLM
APQYQHNQATHT
APRIGLS
APRIPL
APRLPQSLLPQL
APRSSNR
APRYTQTPQALA
APSAADQFMALF
APSGFARRTQTFWYV
APSLLHWGPSFW
APSLPAGYL
APSQTYH
APSRTSL
APSSKSL
APSYPP
APTEHWA
APTHWCYYPPLI
APTHWFYYPPLI
APTHWYYYPPLI
APTPSPGPSYRG
APTPVKL
APTVKNCPSPCP
APVDSVFDRAFSAYL
APVHSSI
APVPPTAWWHLS
APVSYDSHYRGR
APVVRFI
APWAWYP
APWELPL
APWHLSSQYSRT
APWKVW
APWSLRDHLAVT
APWTEHSYYLSL
APWYRVSP
APYDTPWPSPSL
APYEVM
APYSRFQ
APYSWWPYSAYN
AQAFDYVPAWVV
AQAIMQY
AQALGLSAISPR
AQDLNYVRLGPS
AQEHQNLTWRPI
AQGIVLQLAL
AQGNSVK
AQGPPSKQHSPP
AQHQLEL
AQIPPAS
AQKPSLGHLSLT
AQLGSSS
AQMPVNV
AQNPSDNNTHTH
AQPLKQN
AQPNWTSLRSLP
AQPPPSLQT
AQPPTPPAGKFR
AQPQVRPIG
AQPYPFSTRHWQ
AQQHYA
AQQIML
AQQWPEWYP
AQSENARPV
AQSNSMH
AQSPTIKLTPSW
AQSSWVRGN
AQSTAFQKPLLM
AQSTPLMKPQKS
AQTFNSTTE
AQVDVTV
AQVPYFSNHPSG
AQVRGPR
AQVTLPIRTPNA
AQWYPPA
ARAFSYWSVTDTERVKFFVP
ARARS
ARDRPL
ARDWRDY
AREVTLL
AREYGTNRWV
AREYGTRFSLIGGYR
ARFRHSTKSAQFVPL
ARGAPPT
ARGDVFYEGSRGAWY
ARGGGIR
ARGSRG
ARGSSQS
ARGVAPDPTEH
ARHQRFLSSIQRAPF
ARKVKGAAG
ARLGSVLISSGPSSD
ARLHMASTASSL
ARLHMYSTDVQS
ARLPP
ARLSPTMVHPNGAQP
ARLSSAVVK
ARLSVVRNG
ARMRYVDLPVVSGIS
ARMTQLPFAALW
ARMTQTAAFLYT
ARMYIN
ARNAESM
ARNGFLGNWL
ARPAPATYG
ARPHLSF
ARPHP
ARRPKLD
ARRRAEPML
ARRWRR
ARSFFIGQANVAMVS
ARSIRV
ARTMTQD
ARVFGLWLRSMSDMWL
ARVKSRE
ARVMRQVCGGTGCGV
ARWRGD
ARWTQGLPAWGH
ARYDAIWNSEAL
ARYDLSIPSSES
ARYRWL
ASAGELA
ASARAYGECKYGRCTFNGIALPHSTMVKNP
ASDISALSARLR
ASDQMECYPPLV
ASDYWDWEWYYS
ASESYVLFPGTR
ASFAS
ASFAYTT
ASFELHQWYTAT
ASFPPAF
ASFSYWS
ASGALSPSRLDT
ASGSLCC
ASHAVGV
ASHMSWLGPGLR
ASHNPKL
ASIFTTW
ASINSSL
ASISNLTLSRFM
ASIVSLWDSL
ASKLSTG
ASKTGVGWAVL
ASLDRYN
ASLNSNS
ASLRTLTSLLPA
ASLTDRPTLTPV
ASLVLVA
ASMNGKVGWAIHAREAV
ASMSVAI
ASNANLR
ASNMKPSAPMQR
ASNSLTP
ASNWTDFRVTDR
ASPASHGNNNIS
ASPGSSF
ASPLIVAAACSSYFL
ASPPGLDEP
ASPWLV
ASQDITP
ASQGYPEHRHAS
ASQSHF
ASQTLLLPVPPL
ASQVGPAHTSTV
ASRHAIRFIVFPAT
ASRYEVFPLLGPHRMMFKFP
ASSAVDDAPWAVITF
ASSDLHS
ASSHYNN
ASSLDKWALYTS
ASSLHTI
ASSLLNG
ASSLRSV
ASSRSVKW
ASSRTPS
ASSSIVD
ASSSRSHFGQTD
ASSVDWWPVRPP
ASSWKSFWHPNPVGMTPASS
ASTIGNLMPGHS
ASTIRISFFV
ASTLINPLSISL
ASTLPKA
ASTQQPT
ASTRPL
ASTSESL
ASTTAAC
ASVNGHT
ASVRSAMY
ASVWWLGPVR
ASWHQHYMKHKP
ASYLQWVRDTWVSL
ASYPPRL
ASYSDLLYSSFL
ASYSDVLYSSFL
ASYSNLTHWLSS
ASYTQPA
ATAHSHP
ATDHAAPQ
ATDLLAAYPLYSPSL
ATDNYTTRAPRH
ATEIIPIALSRP
ATETLARSLRLF
ATFGVWT
ATFTHYK
ATGKPTRLESHV
ATGSFPK
ATGTVGP
ATHEETP
ATHFMRI
ATHTNQTHALYR
ATKTPRT
ATKVKIPFEAKV
ATLRTYPYMDRA
ATLTDLMWFWMG
ATNAEPS
ATNAPRYTMQWS
ATNYDKWALPYT
ATPHHRV
ATPHYTVGQWNQ
ATPIRQP
ATPLWLK
ATPPPWLLRTAP
ATPQNNMMQAQW
ATPSQTD
ATPWSQWLDAPR
ATQEIHASSALL
ATQHRKYLTLDDWLR
ATQVQHEAMH
ATRGDT
ATRLGRSSR
ATRPLNH
ATSAIHG
ATSHLHVRLPSK
ATSHRI
ATSYGLP
ATTKFSG
ATTLHPPRTSLP
ATTLLLA
ATTSLTPTMANH
ATWGHPRSSQGM
ATWLPPR
ATWRIGP
ATWSHHLSSAGL
ATWVSPY
ATYQHAT
AVAGGRSVVDARVAR
AVATDLWATESE
AVAYPVSAYVPAWVS
AVAYPVVED
AVDPRMFYLLLRGGA
AVDWRQRML
AVERWEKHTWSE
AVFYTTN
AVGFGVI
AVGGQTPIRAKI
AVGLSPDGSRGV
AVLMQKYHQLGP
AVMDKRN
AVMWWDDGW
AVNGCRHD
AVNSLQW
AVNTFML
AVPHRVGGLHSL
AVPRASF
AVPWARY
AVPWGRL
AVPWGRY
AVQGFNW
AVQHNPTHPFYP
AVRGYR
AVRPVTP
AVSIVKR
AVSSFERDNFVQ
AVSSLSSTNYSI
AVTDGKQ
AVTFKFTGTDL
AVTFSKG
AVTTLTLVPAGT
AVTTQARNIPTV
AVVAVPSYIPTWIG
AVVEAQM
AVVLLS
AVVPKSL
AVVQHL
AVYRSTG
AVYSPSR
AWFYPPW
AWGVYLDLG
AWHYRF
AWKQTSV
AWKQTTV
AWLPWAK
AWLSPAR
AWPDKQP
AWPLSQLDHSYN
AWPQTSA
AWPRHAA
AWPSKDN
AWRNMIRYGVDLPAF
AWRRLSP
AWTHTLIRLPD
AWTSPVDSFQ
AWTWSLPTLPQS
AWTWVLPSSIRA
AWVRFWEDD
AWWAPSW
AWWEAFIPNSIT
AWWEDV
AWWEFLD
AWYEWP
AWYPLPP
AWYQFP
AYDTEYV
AYESGYNLP
AYFNLLR
AYGKPPPPIP
AYGYK
AYHPPAM
AYHRLRR
AYHTFTP
AYHWSQSPLAIERIL
AYIHFLP
AYKLPQTDDST
AYLFNPM
AYLIQG
AYNMSTLARDFH
AYNPIY
AYPFQVTRQPAG
AYPGFAL
AYPKADS
AYPLYPT
AYPPSLYDGYNP
AYPQFPNLRTSL
AYPYPHT
AYPYWLY
AYQKWQTGA
AYQMYAIPA
AYSKPTIKLANP
AYSKTPPPIP
AYSMLGH
AYSPISTVTQPY
AYSSGAPPMPPF
AYSTLWP
AYTAFPLD
AYTTVPYMATLP
AYWPSPH
AYYKTASLAPAE
AYYKTSFPPSTQ
AYYPQNHKSKAE
AYYPQNHKSNAE
CAEGGAS
CAIGGAA
CAKELR
CALAGGC
CASVISEREC
CCAVLNGAY
CCLTT
CCWGYGGSLV
CDFLCVRSAVGTMVA
CDPLLKHHTHPK
CDSFARSCVRGVGIMKACGRTRVTS
CDSKYYLR
CDWELCYAE
CEAAQMVRPWVY
CEFPRSWDMETN
CFCSCYGLIGQGDGV
CFDYAPYVSAVDDIC
CFLLSFVVLGYD
CFNDPLDIVPPMLLL
CFRQGCWVIT
CGFAFYYVWLMVVMW
CGGLFAGCAALIDVF
CGWMGLELC
CGYRQLSLFLTCPSE
CHGKLTC
CHKSAPTAC
CHLSATGACRMI
CHLYCEA
CHLYTAGSCNMS
CIFPLCLGRPIAASYPPKTR
CIFTCHD
CIPPLCKLRLHE
CKIHFFR
CLAGGRP
CLGRWCW
CLHCKYTLQQQA
CLHQHNQMC
CLIVCLFIVRCGGCF
CLKTEG
CLLCS
CLNCF
CLNCL
CLNCS
CLPAYGCKSFREPF
CLRNASPHLGCL
CLTCWNVMPA
CMQAHAM
CMTCLVK
CNEGWSKPPPIP
CNGRLYCGP
CNLSSSWIC
CNSGMFVRC
CNTSEPRQC
CPLGLLIHTSC
CPNGLLGPCPSL
CPPGLCEKL
CQCGFGV
CQGKLTC
CQIPHSYGGYRS
CQSDSLSTC
CRDGWCHHDW
CRGDCA
CRGDCL
CRGDCT
CRNQAVRVFCHN
CRTCGEVGLMTRPGVRMNA
CRWSTPTTSQCP
CSAGICFSE
CSGTLFC
CSPTSNSMC
CSQGLLHSAVFALCF
CSRAELSHC
CSSEYGVTYWVLCA
CSSVETH
CSVRGSAWA
CTFTT
CTNILVV
CTVALCNMYFGAKLD
CTVALPGGYVRVC
CVFYANVEEEVQCWL
CVPSFGFVLPNRLAA
CVSVGMKPSPRP
CVVGCGGGV
CVYPAFTPFGQYTLL
CWCDGNLSNIDADLY
CWILPYNTRTRCPLR
CWSMHGLWLC
CYMCQSL
CYMCYQT
CYSMCLDCIMFG
CYTAALA
DAERSGY
DAFAWVP
DAFTPLLGVRQMRRL
DAGDHRAAA
DAGDHSHPQ
DAGDSGYLT
DAGEGGPRV
DAGEVYPGP
DAHVLVPRTP
DALSCRGDCVWPTRG
DAMIMKKHWHRF
DAMLSAR
DAMPAEGVD
DANYPSHGPSRY
DAPHMRHWSWAL
DAPPSGI
DAQQITLSHWRC
DARELY
DARHSSSLQMLF
DARPIVGPFLLH
DATDAGWNKLPWYRS
DATQMPH
DATSAQL
DAVRPITSSAGN
DAWKMRLSQMYD
DCRGDCF
DCTVRIGRVCMAAS
DCWQMDRKTCPL
DDELHTSRY
DDGRRGH
DDLSG
DDLSTTRLP
DDLSYLMVPGLL
DDLVTQKMA
DDNTKQWPSWLE
DDRLTSRDGSNP
DDRPPKS
DDTKHSLP
DDTRHWG
DDTRYSSA
DDTYLF
DDTYNS
DDWSHWWRAWNG
DEHRPAI
DENLSLRPLFPK
DEPEVVGRVLGERPAGALADHHHMMKW
DEPFGVA
DERQIQRQEPMVRNSERDAMRCRTCAFKEL
DETLYGIS
DFDNMFSNLDPGRHW
DFDVSFLSARMR
DFGPLFSDPGFRSAS
DFIIPSW
DFKA
DFLQWKLARQKP
DFLREHGMKNPR
DFLTYNKSMGGRPTNFRHHHSSVVQSQ
DFMAS
DFRFESSLSINDHA
DFRGRLFNL
DFRLRLLGS
DFRLRLVNP
DFRMQNQ
DFRNRLTAP
DFRRLPGAFWQLRQP
DFRYRLLQS
DFRYSTRPFAL
DFSRSRPGIW
DFSRTRAGTW
DFSSNKT
DFSVLQTIGDSL
DFTKTSPLGIH
DFWHHLR
DFYSWKHWGSTT
DGAPAPL
DGARLH
DGFLRPDP
DGFLRPDS
DGFLRPE
DGGWLSKGSW
DGGYWHV
DGHPERHDAGDHHHHHGVRQWRLISTG
DGKQVSI
DGLNSKN
DGLRSDGSWLARFVFNGSGFY
DGNSKPF
DGNSRTQ
DGRNLQL
DGRSYSTKYWFM
DGSIHKRNIMPL
DGTSHPH
DGVAKPT
DGVSTKH
DHARYPWLRPPA
DHASPMH
DHASTWMVKRGV
DHDRLIRRTAQI
DHFGMHR
DHFLVSP
DHGLFTQHIMPD
DHHTYNH
DHIRISTSYKSP
DHKMRH
DHKPFKPTHRTL
DHLPSPW
DHLRNPF
DHLVTAP
DHMGIGS
DHPPWYTWLYR
DHPQTRTAPKPV
DHPTNQLAVPSS
DHQRFFV
DHQRMNDAMLVL
DHRGHYG
DHRQGSS
DHSHSNTSGPWV
DHSPFYLSTAHY
DHSSADLINPVA
DHTGKSPGLFHN
DHTHYSH
DHTLFAASHNHR
DHTLFSTGHSHG
DHTSAAK
DHTSWHP
DHTTNPFGTPLP
DHVSWHY
DHVVEGR
DHYAPERRPFFQ
DIAGERV
DICTNQCARPTG
DIDFRSRML
DIDYSDYSTR
DIHSPTRQSPYY
DIHWTSMMVRPT
DILDGLK
DILHYSK
DINTNSF
DINYCDPGRDCDGHL
DIRQPIIGTLHP
DKGRTQL
DKIHFKS
DKIHFYP
DKKSWLGSWL
DKLDNPGGPTVG
DKLYVTL
DKNLQLH
DKSVHHGPRQQF
DKTILSTNWLRV
DKWAEQY
DKWAFMT
DKWAGPR
DKWAGRA
DKWAIPW
DKWALAY
DKWAPPG
DKWAPPS
DKWAPPT
DKWAPRS
DKWAPSA
DKWAPSW
DKWAPTS
DKWAQTY
DKWASQP
DKWATRF
DLAKSKLML
DLALRNPTPSDP
DLASRHT
DLDWRQRLF
DLESKAL
DLETKFMRQ
DLETSFMKV
DLFARRPASSDW
DLFARSH
DLFQFAFPLNTI
DLHSHHHGHMNH
DLKHPAS
DLKNPTA
DLKPPIPSQSGP
DLLLPGR
DLLQPNM
DLMPSLPNYAPL
DLMTSKYMA
DLNTNRTGMVLH
DLNTNRTQMVLH
DLNTYKMSL
DLNYFTLSSKRE
DLPMHPM
DLPRWPGWYKNR
DLPTSKMNL
DLQALLPNYPRI
DLQTEKYMG
DLREHTL
DLRPFWF
DLRRLGY
DLRRSGY
DLRSAF
DLRSLGY
DLRTSGY
DLRTTSV
DLSRTAL
DLSTSKLQI
DLTKSSAP
DLTKSTAP
DLTPYPL
DLTYVNSQ
DLVRVIQ
DLVTSKLQV
DLWFHPN
DLWGWDLAY
DLYDSLS
DMFQIGKYG
DMGGLFRKG
DMHHKPGRTLHH
DMKQGPS
DMMLISEKEL
DMNHTKSSYNPS
DMPGTVLP
DMPLWWT
DMPRTTMSPPPR
DMPSQWG
DMSDRSL
DMSFQLVTPFLKALPTGWRG
DMSLSSSTSSLL
DMWMNHESYSNN
DNDEPGSRYNWW
DNHEHRFWHWDS
DNHSPVNIAHKL
DNKRSPA
DNN
DNPHYTT
DNPQFSS
DNRHSTP
DNRMFRRLSLRV
DNSAAQYFSRMP
DNSHWFRRISRGDAG
DNTRVAAP
DNTSKTQ
DNTSPSE
DNY
DNYKLCESDVGRLLF
DPAFIFYHSTLFFNS
DPDQLGVRYHKA
DPEQPAPLFLVS
DPESSFMKV
DPEVAARELGPPVES
DPGKIYFHIAVS
DPGRSNWSMSFD
DPGWLSKGTW
DPHFHL
DPHFLDD
DPHNGRFPSTQL
DPHWVGRV
DPISMLGKWY
DPIYALSWSGMA
DPKGAYT
DPKRNPDRIMHP
DPKSMPK
DPLKPSA
DPLLNGV
DPLSHNL
DPMSNRS
DPMSRITMKPHI
DPMTWTPSSVMR
DPNEMSQ
DPNTNNF
DPNTNSF
DPPPTFGPHSRS
DPPSYHASS
DPQVNPA
DPRAATST
DPRALDYWLR
DPRATPGS
DPRATTST
DPRAVSGT
DPRGAAIS
DPRIATMS
DPRINAST
DPRQWLGQYL
DPRSATMT
DPRSATVS
DPRSSAMT
DPRTAAMA
DPSPHTH
DPSTHQHPPHKH
DPTLPLN
DPTPYPL
DPWAFRWPSGPM
DQASRLV
DQDQGHT
DQLLHNM
DQLLSGSTPWSF
DQMPAWT
DQPMHWF
DQPMHWI
DQPMHWL
DQPRHWM
DQPSHWM
DQPWHWI
DQRLPFL
DQRPLLTAGNPL
DQRTTRL
DQSHTPN
DQSKTIA
DQSKVWLLPSWK
DQSRMPT
DQTCNSPPCPPL
DQTGGTN
DQTTLQRFLGSH
DQVAGYS
DQWMMAWPSLTL
DQWNLHRPTNNK
DQWTAVGSK
DRAHEQEWFYKT
DRAQLTWPAWLE
DRCWSILATSTF
DRDIISGRK
DRDYFLGWFTTPSIG
DRERDPWLVARR
DRFTSDLRAPDS
DRGGLMKTN
DRGGLWKTP
DRGMTNL
DRHFNYL
DRHNLTF
DRHSRIVILMPLAYP
DRILSPS
DRKFFLGKNW
DRLHMEP
DRLLTTLSGPAQ
DRNGSNA
DRNIITGFG
DRNMHIP
DRNPMSF
DRNVITGHS
DRPPHLGDPPHM
DRPRVKPK
DRPSMGPSQFHT
DRPWVRPIV
DRQMAL
DRQPPQP
DRRGDGF
DRRYMP
DRSAFSS
DRSAGDS
DRSPRMFYNRFNSAL
DRSSWSKPPPIP
DRSYLSFIHLYPELA
DRTAMQVAA
DRTHLAM
DRTPWPRWLLSY
DRVTLG
DRYDMRNWMA
DRYNSEWLPYSP
DRYSEIRTSSTL
DRYVSWH
DSAASHFTTQFR
DSAFVTVDWGRSMSL
DSARGD
DSASHS
DSDVGWVND
DSDWPVS
DSEHMTS
DSFRVWP
DSFRYWA
DSGRYSMTNHYS
DSIAFWNRRPA
DSLHWSYMLLPS
DSLRVDEHHEVMVPM
DSLRVDEHHEVWVPM
DSLTARL
DSLTYMH
DSMDVFQPPPIW
DSMNTDTSTRPR
DSNAES
DSNKSGR
DSNRGGLWRK
DSPFMYW
DSPFSF
DSPLHAT
DSPLSNL
DSPLTRN
DSPTPMH
DSRDLVS
DSRNSAT
DSRPSPSTSSHL
DSRSDIWSIWSLGRERS
DSSFMYW
DSSLDWH
DSSNKPTG
DSSNPIFWRPSS
DSSPDYTFTSAR
DSSRHTH
DSSRLERV
DSSVRFTG
DSTHPRS
DSTINRL
DSTKASDA
DSTKAVAL
DSTKIGTS
DSTKSGNM
DSTRGSPA
DSTRTTSA
DSTTPRS
DSWFPW
DSWQKMR
DSWSTS
DSWYRD
DTADSSKYEPLM
DTDFRQRLL
DTDPPGL
DTERLYRAGQEV
DTFHSPLVALVS
DTFTYWY
DTGHSPEPGKVP
DTGSLVWLSQRS
DTGWVNP
DTHERAWHLWQGTVSLTRP
DTKKFGY
DTKKNHC
DTLPLFI
DTNPLWS
DTNTYYC
DTPITPA
DTPLPPW
DTPYDLTG
DTPYPHN
DTRDLVV
DTRGDW
DTRITKR
DTRPMTHLLEPV
DTRTLQS
DTTKGGNP
DTTKGPGT
DTTKLTND
DTTKNGSG
DTTKSTTT
DTTKTSAG
DTTLNYRGA
DTTQSMHT
DTTRLSDQ
DTTRTHMP
DTWARWML
DTWRPVR
DVAGGLG
DVCMGKLVCTML
DVEQWGKAV
DVEWVDVSSLEWDLP
DVFAKQFTLMLN
DVFEVWMGRV
DVFTYWMRRD
DVFYPYPY
DVGALLGPWL
DVGTTE
DVLMHGFDPALI
DVPAPKP
DVPLNWSTFFSPSTR
DVPNWRT
DVPWRDL
DVSIGV
DVTTPSP
DVVYALSDD
DVWGLD
DVWGRD
DWAPHFT
DWAVWNRR
DWDQFGLWRGAA
DWDTRGLWVY
DWGDLESSVL
DWKARREG
DWLVWYG
DWLWSFAPNVDT
DWNKAGD
DWPLQKL
DWRHRLVNH
DWRNHWL
DWRSRLVIG
DWRVIIPPRPSA
DWTKPQS
DWTWSWN
DWTYSLPGLVEE
DWVAVKQSYF
DWVDVREVLTGEQRV
DWVF
DWVPFFGFFFSRLQLP
DWYHS
DYAWDDFYAMGD
DYAWDQTHQ
DYDGYGWRE
DYDMTKNT
DYDSLSWRSTLH
DYGPREKLYQML
DYKLSDKWAQHA
DYLQNNA
DYLSNPKGPSHR
DYNRFHREYVVS
DYNRLNSTSSAL
DYPPYLDRYAHW
DYPSANKWPRYV
DYRGRM
DYRSWGAVPLQL
DYSDLNKLMH
DYSNESSDPGRLWHC
DYSSHGF
DYTNSVSMRYLS
DYTPQTSLELPPESF
DYWAFWRVYFQVDGY
EAAGANIAP
EAAKQGE
EAAPNFYPPLTF
EAARRSRRIDRHLRS
EADDSSPGR
EAFGMR
EAFYSQRF
EAGKHSG
EAGPRAAP
EAGPRASP
EAGPRSAP
EAGPRSNP
EAGPRSQP
EAGPRSTP
EAGPRSTQ
EAHVMHKVAPRP
EAKAILT
EAKRSYHS
EALYGMS
EANAPLDMGVFFEHN
EAPAK
EAPAQLP
EAPESRVVAW
EAPKKPAHGMWY
EAPLQYSYSYRA
EARTHNEARRRR
EARVFSSKHWIP
EASPERPSPAFP
EASRSATL
EASTKLT
EASYRRKQ
EATFVYPAP
EATNSHGSRTMG
EATTRAY
EAVRSAMW
EAWFSYW
EAWSPL
EAYKRRWHWP
ECRPCAD
ECSEGWCDMKIDRLDAGG
EDEWGGSLV
EDFRFESSLSINDHA
EDGGAQSYP
EDHSPVNIDHKL
EDIKPKTSLAFR
EDLSTQRIK
EDNSPMLMWFNKTWS
EDPNLQSSLRMP
EDPSHSLGLDVALFM
EDQYLSSEDFLL
EDRPMVRV
EDTKTSH
EDYELMDLLAYL
EDYRHSRPGRLN
EDYSTIMKTLAH
EEGPWSTHVGRT
EEHKLMSVLW
EEKEPER
EEKIWRTQA
EELSTSKWL
EENL
EESPKRY
EEWNWLR
EEYLLSEYVM
EEYLVSEYVM
EFAISST
EFDAGDVLL
EFES
EFFF
EFFFPSF
EFFQQHMLRVPR
EFGGQMN
EFGHGSPYETRQHSQARRWL
EFGTRHMRHR
EFHLGES
EFIKSGRTLDRL
EFIRSPHSVDWL
EFISPPW
EFLF
EFLHLSPTGGVWLAS
EFNAARL
EFNPSNL
EFNQWEDPGRMRVGC
EFPTFSWSYINDSLL
EFQQWSGK
EFRESSV
EFRGRLLET
EFRSPSW
EFRSSVKPQHPL
EFRWAWA
EFTEPHSSQLRD
EFTYPSW
EGADLEFRR
EGEVGLG
EGFLSAW
EGFTRPSP
EGGIFWH
EGGLSGC
EGGSFNW
EGGSVES
EGGYRQRLL
EGLDTWPMR
EGLHQRK
EGLPANP
EGLPNID
EGLVWIGMD
EGMHYHT
EGMMYTDV
EGPAPEE
EGRARWL
EGRERWR
EGRFGGGQV
EGRGDWH
EGRSDIW
EGRSEVDIDDQNTSVYKLW
EGSGTTK
EGTLVHTSNIPM
EGVLETS
EGWCEMHSRWCVVS
EGYLRPDT
EGYLRPES
EGYMRPDP
EHEQHLSLQRWF
EHFFSRS
EHFSLHP
EHGAMEI
EHLDWFEDWALW
EHLHFPTNFKPP
EHLSHAA
EHMALTYPFRPP
EHMYNTPHTYHTTMKNNK
EHNDFPMYTWRP
EHNSALV
EHPPYLQ
EHPSWAL
EHPSWYP
EHPTTQI
EHPWPLL
EHQLNRA
EHQTGTW
EHSPAFIADPLY
EHSTGRY
EHTMAGWWHPSK
EHWPQWGLALKR
EHWSHDMFSPGD
EHWTWPV
EHYLDKWASHDM
EIALCGP
EIALGAR
EIAMTTL
EIDAPRVFDARFSRHYSVQL
EIQTTKMGMA
EIRGDRAHW
EIRRAP
EKFASNST
EKFP
EKHQPER
EKLHTAS
EKLKHSM
EKPHFLV
EKPSESRIAQLG
EKSSWLAEWL
EKTTPLR
EKWGMHQECYRH
ELAKRSKELEKKLQE
ELALWST
ELAPDSP
ELARQNP
ELCFKCS
ELDLADALPVLA
ELEENMFCSWKLWGYSCRGP
ELFSTKMDI
ELGGNPD
ELGPSRS
ELGSALL
ELGVNYYSATSR
ELIKESR
ELIPMLIMQSTS
ELKIIQP
ELKTTKYQD
ELLLCS
ELLSGL
ELMAVPVPLPPA
ELMNPLLPFIQP
ELNAQHIMEPKY
ELNPEPDTEVFPMTF
ELNTFFRWTTGG
ELNTWKMDW
ELPALRL
ELPRSPS
ELQIVPS
ELQMRALQRLQP
ELRGDGW
ELRGDMAHW
ELRGDRAHW
ELRGDSLP
ELRKSSLAFL
ELRWDLTDIYNL
ELSARGM
ELSRRPM
ELTNAQIKLLWE
ELTWPHVHRKPS
ELWQRPM
ELWRPTR
ELWSIDTSAHRK
ELWTPVQVP
ELYENVGMY
EMDWMKIWR
EMFFPV
EMGFRARLL
EMKPMAPITRYT
EMLQGAGAM
EMPGAMR
EMPLKRGVD
EMQTSTA
EMRGDLAGF
EMRTERV
EMSVDWWSPISS
EMTETKH
EMYFTKQ
EMYRKPMHAQLR
ENEPPVWTTESKLQS
ENGADVD
ENGLHNRSLNPR
ENHSPVNIAHKL
ENHSPVNIAHKV
ENHSPVNIDHKL
ENHTHSNTSSAL
ENHYPVNIAHKL
ENKLSPY
ENLSNWQIS
ENRPKVSPI
ENRSDKV
ENTQKNS
ENVWYPR
EPAHMSL
EPAVSRTRPW
EPCCCENRDVGRLIH
EPDKMTT
EPEIRSNN
EPEKPRT
EPFAGRS
EPGHDAVP
EPGLDR
EPGLRF
EPGQRLL
EPHSMRP
EPIHRSTLTALL
EPIHRSTLTAPL
EPKTKHI
EPLGLV
EPLQLKM
EPLSIFS
EPMDLI
EPMSLS
EPNIADFFYRSM
EPPHRHA
EPPPAQR
EPPRYKKHGGAS
EPRSPQQ
EPTLYSM
EPTTAQW
EPVESPWSRARL
EPVQPHST
EPWLDSRYSPLS
EPWYYSP
EPYELY
EPYMLGVTR
EPYYPSY
EQATPRNHNSPP
EQFAKTCPMQAVKGGWASTLCRSVYSGNVR
EQFLLIG
EQFPIAFPRYSI
EQFYPAM
EQGGRRL
EQKLISEEDL
EQMSVAQFTRA
EQMSWMQLLVEM
EQNLERA
EQPVHWS
EQPYIEN
EQPYRSM
EQQQLSWPPFLP
EQQTIRL
EQRGAPR
EQTINQW
EQTLSGQ
EQTQARV
EQVGGPR
EQWLGMS
EQWPWSLLPIHY
EQWYPSY
EQYQLAWPAMQS
ERAGAMERAN
ERAPLSVE
ERDIISGIA
ERDMRGI
ERDVVRGTV
ERDVVTGRA
EREAHQLHSHHK
ERFGGDE
ERFIDTQ
ERGDLRM
ERGWFGG
ERHLTFT
ERHNDPGRYFVEYET
ERILWVV
ERLNLPQ
ERLRKA
ERMNHNP
ERMPAHGVD
ERNYNDFCDPGRFGL
ERNYNDFCDPGRGGL
ERNYNDFCNPGRVGL
ERNYNDLCDPGRVGL
ERPLHIHYHKGQ
ERPQPLDPQTFN
ERPSAVNTSSWL
ERPYSRL
ERQGTPYSMYVL
ERRAPG
ERRVVSE
ERSLWQEHQNFP
ERSRRS
ERSWTLDSALSM
ERTSHHS
ERVIGTGWVR
ERVMLPFPPAPW
ERVMSMM
ERVSP
ERVWSDEHENYT
ERWHNKH
ERYMGLP
ESAHHHHWKNFR
ESDLFKMASS
ESDPPVASYQWRLIN
ESFVPPWVVTVPPPR
ESFWASRFSSLGGMA
ESGFPTVG
ESGTATG
ESHQHVHDLVFL
ESIAFWNRRPA
ESIPALAGLSDK
ESKLPLPGAPEP
ESLNSFA
ESLTNNSTASHL
ESLWGGLMWTIGLSD
ESMDRRGVGELWGTPSKSTR
ESNKSS
ESNPVDGAHLSL
ESPNSLK
ESPSHAT
ESQSVL
ESRGDSYA
ESRLTSEFDGIH
ESSAIRY
ESSWQDMLYLLR
ESSYSWSPARLS
ESTDRPI
ESTFYYW
ESVDCFADSRMAKVSMS
ESVMQSYPPHLQIPG
ESWTNSWAMYFG
ESYSEW
ETAPLSTMLSPY
ETAPPTPYSVMF
ETDNMKPLHLRQ
ETDSNAV
ETELTY
ETGEKPQ
ETGERIVL
ETGNRGH
ETGSNTI
ETKAWWL
ETKRS
ETLAKDRWVTLG
ETLDWWRVG
ETLPITLIARLT
ETLTTSKWR
ETMQRDVRA
ETPLTEPAFKRH
ETPLTETALKWH
ETPTPWGRARV
ETQLTTAGLRLL
ETQQPRT
ETRDWFRFE
ETRDWWRLS
ETSMSST
ETSSSIA
ETTKLQRFQAML
ETTLPSIKW
ETTQRPM
ETVRQAEELFYV
ETWSSVKLPPGI
ETYVFDNHFHAP
EVALSKP
EVASYWRWG
EVEGCEL
EVFGWDRFW
EVFWARL
EVFWPLNAPRLL
EVISGL
EVLHGHHHVVARVRASCTGPTRRASCA
EVLSHAGAH
EVMNNWTLASIM
EVPTHRQ
EVRGDSLP
EVRGWSRIW
EVSLHDMNLATH
EVSMYTDV
EVTSTAF
EVVYQQSPNTPT
EWDFFWPPTQTP
EWDITTECTVTF
EWFWSWPGYSNT
EWGGAQF
EWIYHYW
EWLAYDGIRAYS
EWMIHYDSALTS
EWQYHWPTLQSR
EWSGLLY
EWTDNGLWAL
EWTFQWNSYPAD
EWTVNERTMWDL
EWTWVFPTTHTS
EWTYTFPTAHSI
EYDNQSHWARPK
EYHHYNK
EYKE
EYQPHQTGL
EYRARGWGGWCR
EYRGDGF
EYRMAHLTPSLL
EYRVENRIQPIRAYSGSLNR
EYSDSGIEV
EYTHTPY
EYWYCGMNRTGC
FAAALI
FAAMPAL
FAENKKDHFSPG
FAGAAWHERLGYGHAT
FAGSLLV
FAGVFVL
FAGVPSW
FAHEGSASFRLSSKVEDWVSR
FAKDYSR
FAKLPSG
FAKSPDVSLNPS
FALFGEE
FALPSWH
FAMAEA
FAMWYPLGWR
FANGRHS
FANHLTNAVHAL
FAPQTTFTRPPY
FAQDLQG
FAQVWG
FASLHYDKP
FASPYLT
FATVERA
FAVDEQE
FAWHWKILSKFCLWLG
FAYGSSF
FAYLLG
FCGDCVL
FCSDCIL
FCSFCVL
FCSLTSLATSCGAAVFIPFR
FCVNNGTTCSVWRCD
FCVRLMCSGLIPFFVLCCFFA
FCVSNGTTCVCIGVV
FDDARL
FDFNRRI
FDFPPWA
FDFRSRLLS
FDFWLTP
FDGFSFLAFEDFVSSI
FDGNHIW
FDGVRKKSRGKSLEY
FDHSGRR
FDHSSKWTRTSP
FDLAPADRNWGS
FDLSRMNPE
FDMATNP
FDNATWGPRMKA
FDPFLRTLQGTH
FDPHEPTNTRSP
FDPNNYWTPMGR
FDSLVAP
FDWKYNLLAHPQ
FDYGYFW
FDYSKHV
FEDFNEQRT
FEFPRSWDMETN
FEGFSFLAFEDFVSSI
FEGRSRS
FELPSWM
FEMGTPV
FESIWP
FESQSRL
FETLPSR
FEWPSWG
FEWVPMI
FFDPSWN
FFDRYDSARDPGRLL
FFLAS
FFLRDWF
FFSPSWL
FFVSGVL
FFWMTRI
FGAHSPL
FGCLGKLVCDPPY
FGCRVESVSTHC
FGENNNM
FGENTGY
FGERNRI
FGESRNA
FGFRSVHG
FGGDADR
FGGFFMY
FGGRVSS
FGGSWSL
FGGVSNEDVPSVHFKPPSSR
FGILTEEMYRRW
FGLTAPRSASIL
FGLTPST
FGNPGAA
FGPGSADFRHMN
FGPPGLDRP
FGQNAPR
FGQNRANPQLPP
FGRHAA
FGRIPSPLAYTYSFR
FGRRNLF
FGRSVSKPPPIP
FGSNDPY
FGSNQSQ
FGSNVHF
FGSRYLTA
FGSSKGRAPGPRFES
FGTGLASHSPAW
FGVGQWA
FGVRTDL
FGWTWEDSSSNSLYDMSFPH
FHAEWPTPSPWP
FHAFAL
FHAFHAWSAA
FHARLQRLPPHR
FHAYSKLTKSLL
FHENWPS
FHENWPSGGGSA
FHEPKYR
FHESCENSDPGRTYA
FHFNPYTGHPLT
FHFRPPPPIP
FHFTRLD
FHGHGLY
FHKEWRTHFQQR
FHKHKSPALSPV
FHKHSPRSPIFI
FHKNWPIWWYPP
FHKPFFPKGSAR
FHKPFKPTHRTL
FHLDNPFLADRS
FHLPYNHNWFAL
FHLQSYH
FHMGQPF
FHNHGAA
FHNHGAP
FHNHGAT
FHNHGKQ
FHNHGST
[truncated: 11,272 more rows]

## Sheet: SAART
AAFHRAHHLTSP
AAGASAAQL
AAGGFFRWIFSPVYV
AAKWQKRVE
AAPAGVLHIRHLVGPNRYNF
AARLWQW
ACCCLN
ACRSEPRCFP
ADGGAQGTA
ADGSPDLPA
ADQKPGE
ADTVPRH
ADTVSGAMV
ADWVDWESY
AEAKASTLHVYLM
AEGGLEHLD
AELFRWGSSA
AEMVKSSID
AEYAFGGTD
AFCDISFCHLNDRIIIIITN
AFGAQEDNT
AFNATASMS
AGAAMSH
AGEDSGAHHRLRWETGRARW
AGELSMQEWQRFRDLSLGRS
AGGGLGRW
AGISRTAYPTRVPYT
AGLHLFWSYSSYVTP
AGLLELNGW
AGPDCSSLPNSMRCS
AGRACALAG
AGRDLF
AGRDLL
AGRDRA
AGRDRF
AGRDRG
AGRDSH
AGRDSV
AGRMSQRGVDQVEWHLSRFY
AGSNINLVD
AHGGCYPGQ
AHLPIVRASLPS
AHLYFDSGWASRHWT
AHMSEVEGG
AHWNSENTVVGLPSK
AIPNKLNVWPPH
AIRDIAGDS
AIRSQQGRA
AITASDSMS
AIVIENYYTLCC
AIVVSMTPFQQWSLS
AIYSRRVLR
AKLSRK
AKQRTDPGY
AKRTQIAFL
ALAGHS
ALEASRFISWDIN
ALEMRAADVEYHF
ALRSDYKWTD
ALTDLWSFLVLE
AMSAPIP
ANLSRK
ANRVSEMTE
ANSISFDDD
APDSSAWSD
APIKAPTIRDTA
APNLSISDS
APRPGPWLWSNADSV
APSPMIW
APTGAKKGGTTSSLASHYRN
APTVEADNN
APVAGVRHN
APWHLSSQYSRT
APWLYGPA
AQATALP
AQCLRIP
AQDLAVITG
AQGGRNQHW
AQVWGRRRM
AQYETSYPE
AQYTPKWMM
AREGKDDQLFLYQSLQRYWR
AREYGTRFSLIGGYR
ARGGEGTED
ARILDCKMDDD
ARLSRK
ARQPRGHMW
ARRYSR
ARVSFWRYSSFAPTY
ARWDFLRS
ASAEKAHRR
ASCILS
ASITHFKSGKSH
ASPVTARVLWKASHV
ASSHFDGSD
ASSLLASSP
ASYQDLGSS
ATEARE
ATESAM
ATEVVG
ATFTKDAAT
ATGQYRGHS
ATPLWLK
ATPLYLR
ATPTQRE
ATSGDAYWS
ATWAEQWRT
AVAHVTSRVPRWSAA
AVDNQLHER
AVHARHYTPWQQLYS
AVLWWFNER
AVPRASF
AVRHSVIERTLS
AVSGIGTQTSIPYPS
AWERRG
AYAIDYKRTD
AYESGTGSS
AYGFKLGLIK
CACRLK
CARSGMSGW
CELEKC
CFSWRCR
CHRCFHFRRHPVAVF
CIPTFF
CLARSRLPAIPS
CLYTRYWC
CRFVWC
CRLEKC
CRTEPGCYVR
CSDTYCTIPTYGRDRDVRRD
CSSRVEPRAC
CVRAPTL
CVRPFAL
DCEYRDKVTLFNLVRLVMTKN
DDWEDWEAVP
DDWFQRVVSPLM
DDWFQRVWSPLM
DEHMEGNAG
DFFEII
DFLAIV
DFLAWL
DFLEIL
DFLEIV
DFLEML
DFLEQL
DFLERI
DFLEWL
DFLEYI
DFLHFI
DFLMLV
DFLVQL
DFMEWL
DFMIEL
DFRWATHMHTPA
DFVTRSPQD
DGALEERHSVLRRTEAEYQM
DGEQGFMINERHSVIPPWSS
DGFADLASD
DGRPSDIPT
DGRRDVVVRSATFYL
DGRWGDFWL
DGVADAASN
DHPMEFRSKITMK
DHRLGSRNS
DHRSPPWLTSLLTIS
DIRATQA
DIRTQRE
DIRTQTR
DKMGRTSRW
DKPTAFVSVYLKTAL
DKSSNDSIA
DLFWEL
DLGVDIEMEVASRVRGGHSY
DLLFEL
DLLFYY
DLLRGA
DLLTIL
DLLWDL
DLLWEL
DLLWES
DLLWHL
DLLWII
DLLWLL
DLLWLV
DLLWSL
DLLYDL
DLLYEL
DLLYHL
DLLYLL
DLMFIM
DLMWAL
DLVWLY
DLWAFD
DLWALL
DLWHFP
DLWRFS
DLWRLV
DLWSLL
DLWSWR
DNGLAGRDYERDVRERVMKL
DNGSLANGE
DPQSDLGKLRTG
DPRVWGRDVEPHVFYKYWRN
DRAPLIPFASQH
DRAPRIRHSVII
DRFRHI
DRFRQV
DRHSVVTEDPGALDRRTHSF
DRLWHY
DRNLEGRGK
DRRDDAVSE
DRRPHNWGE
DRSMEWRMM
DSGGSGIAS
DSLRWGKVPV
DSPQNPKTWKYI
DSSDDRHTCGHHICHLYPFS
DSYFCDNFLCRLDHNRNSRN
DTGHHR
DTHFCDDNYCPLPHSSGAIA
DTLKPGE
DTPYPWGWLLDEGYD
DTWPTARLTSSMQYI
DVQEFRGVTAVIR
DVSGAFMAD
DWERFSWPY
DWLFDR
DWLWHY
DWNMLKVKLYALRVRRRRMAN
DWRTPLQQH
DYAWMY
DYFSSPYYEQLF
DYFVNSRHN
DYGRAMADLWQF
DYKCHDTGTD
DYKFEDNLEC
DYKFLDEVQN
DYKFMGYVAS
DYKGLDRGVI
DYKMMDRRDF
DYKPSVNEGG
DYKSTDKWGY
DYKWEDKVCI
DYMEVVGNKISYI
DYNEVRRQMSMQM
DYRSCL
DYVCWWKASV
EADRAADQEAQMWTTKAVML
EAGPIPGDG
EALEQLGAL
EARGEVWGR
EAWARWVFAWLWGHG
EAWDKRDEQTIYESLSWLSA
EDISLSMGE
EDYPDISVG
EDYVYVKDVGTTN
EEMRWGRLLS
EETMNGMPM
EFDRFR
EFLGWGKAV
EFNDGSGVD
EGGGGLIND
EGLYSPWWPRSLPVL
EGRHSVVHQGAA
EGWMRGYRGFLQSQNLESGW
EHELDPVMA
EHPYITV
EIGGMGAGG
EILRWGAIAP
EIRQALARE
EIYGAQGAVGVLFGPGRVWL
EKERRPSPIGTATLL
ELAHPFWERY
ELANSVPWASPP
ELFRWDTTHT
ELREEYKQLGYTGPH
ELRRFLELL
ELSPSSR
EMERSSSMA
ENARSVNDD
ENGRKS
ENPVLASDS
EPLEKCVRRHSMRDLSGVCP
EPLQLKM
EPMTPHQWITLYRSY
EPPFFRKLP
EPPWVW
EPTGRDAEDWIYRAQGRFYL
EQAELTRTMQQLFRGTQVRS
EQQLKGRQTHIII
ERTGTYSPWQQLRVE
ERTSGVDNPRYHATWTTRLR
ERVREYYPEP
ESDRDWGQECSNWYADCRYP
ESFTPVWMLL
ESGGSGSTE
ESLRWDQRIG
ESSTQDFPD
ESYETPQWLL
ETPGWLMMPE
ETPPWMLATE
EVDGRWWIVETFLAKWDHMA
EVFRWSAASV
EVPPGV
EVPRLSLLAVSLVAN
EWACNDRGFNCQLQR
EWDPAPAME
EWKAMLVKR
EWKGMNFIGSRP
EWLRWLIYP
EWVDPRGED
EYFHANTTRIVQS
EYSAPSADA
EYSSSELPP
EYTNDLLLRLLS
FAAPMRTVQKID
FARLVSSIRY
FCAVRWGLPC
FCKAEPLCAR
FCPPILPYSAWCPVP
FDDYKMTDIY
FDLWSF
FERARSRLL
FFEVAH
FGALKGARG
FGDLWCFACNAV
FGKMKPARA
FGRLVSSIRY
FGRRAE
FGTPIGKPLR
FGTPPPKIA
FHETPEWMLA
FHKVYRGLL
FHLGTWRPG
FHNQRMAG
FHQLRGGSL
FHRWPTWPLPSP
FHRWPTWPTSFS
FHSNWPKGSTSL
FHSSWPVNGSTI
FIRKHLNKL
FKHSVV
FKPLGGAAL
FMAMRAVRL
FMRLGGGHL
FMTMWAWET
FNAAVL
FPARSISHK
FPGHSGP
FPIYNQRGFITLASP
FPLLNML
FPRTIAP
FPSSLIIPPLPN
FPWHFFSPQLRG
FQAEAARAVTYSS
FQAVEASKTLHFW
FQELKAAETFWM
FQEYTGTYDIMDP
FQGLGASFV
FQKETLMRYWGPGRYFTAY
FQNMRMAG
FQPLTPLCR
FQPYEVQRITTVM
FRHSLL
FRHSVVDYGLYN
FRLARSQML
FRRTVNNKL
FRSWMHFVTYVSTGG
FSAATE
FSAIRNRIL
FSAPVGKPGK
FSAPVGLPGL
FSDLHK
FSDLNK
FSDLYK
FTETPMWMMI
FTILRY
FTMLMNQVM
FTPEWMLQHG
FTYYQSSLEPLSPFY
FVAKSPAKHNPVSVR
FVGYRPAGW
FVKDRPLELRTFGTL
FVRPFAL
FVRPFPL
FVRPYAP
FVYHLL
FWEVVTITN
FWNRFA
FWYWHTTQR
FYDSQPQVLSTT
FYSHSFHENWPS
FYWYPY
FYYYPY
GADMDRRIS
GAHRLHQ
GAPPRAFAG
GATHEVGGD
GAYAVGRWSYVDA
GAYHTV
GCDLYI
GCGRRYDVTCHYVFA
GCGTSWQGELCKSIRLRYVP
GDCFFGFLNSPWRVC
GDLVQDVTA
GDTWHGAYFYGR
GDTWVWYCWYWTRSI
GDVTWPQGEEWTEEHWVRWS
GDYKFADDMA
GDYQSLVED
GEASGLCCRWSLRVV
GEASGLCCRWSSLKGC
GEGVMSPTQQRGPAR
GENAEALEAQVYYQSLRDFW
GESMAERSMAQERLLTYFMV
GESSGGADD
GETLDPSLE
GEVMHQGDWGAENFYLTLSA
GFDRLK
GFGWPVGLKV
GFLSSCNFRFCELVR
GFPWQKAYM
GFRGMAAWR
GGAGVAKHE
GGASDLDRLLSE
GGDFAAANG
GGEEWFRWA
GGFMAGIREKGAGREWNALT
GGGERSLVQESLLWSASSYA
GGRHPSPMGTFDTQT
GGTESMTAS
GGVKGWRMM
GGWMRGHTHLST
GHGLLQYTDVMF
GHLSSRNFV
GHRYTSSVSLTEACP
GHWEARE
GHWHHITKVSKQ
GIADLNDAS
GIFLSEGHSPVNVGPNRLKV
GIGMGHSEQ
GIKLGDSVSVWR
GIKVATQTQR
GKRPSCTGCSYELAQ
GKVHHRNSS
GLDPYHRFCDDNVCSIRPFN
GLISDSGFLIPSKRR
GLKPWGGRG
GLPPYSPHRLAQ
GLRGEVEEG
GLRNSVPYQTFT
GLVEAH
GLVLWGEDREEWHQSLQAGL
GMNNASFPD
GMQAGDQDD
GMQMHQRHVYLSKRP
GMTILGGRMGFR
GNDWPHW
GNGAVWEGKKLSTSSSLRVL
GNIIPDRPMHPT
GNRPVRPQVYFSASS
GPEEEAGGGGFMRGASRMTQ
GPFRSM
GPGIRHSTVPAY
GPLRSM
GPQSATSCCYVSTGG
GPRPLSNSVSAI
GPRPNSPAPAGS
GPRPPAALPHPL
GPRPPDW
GPRPPMV
GPRPPTD
GPRPPTI
GPRPPYA
GPRPTYM
GPVEGDADG
GPVWSSGLYRLFYAS
GPWMLW
GQFATSPKITIHK
GQPTPRNAGLPL
GQQERVWPS
GQRSYSSMQ
GRIAPEPGGG
GRQGRGDMW
GSDSDLTFD
GSESTAERKSPDTPQLVEKL
GSGGAENVS
GSLDDITDN
GSLIVPEWHLAPPGL
GSPSEYSSQ
GSRDGVISE
GSRPSPIGSKWALQP
GSTSMGPQQFAWGTL
GSWPSLL
GSWYAWSPLVPSAQI
GTHYHASP
GTMLAAV
GTPPMSPQVSRV
GTSTFNSVPVRD
GTVTLGRFSRLSLFG
GTWFTNFR
GVEVKRQLSYHYM
GVHMESMRRYTVI
GVRVPFWEGLEFFTL
GVTDSSTSNLDMPHW
GVVWRYTAPVHLGDG
GWAIESIRW
GWRGVHQFGSPRQHR
GWRPDF
GWSDLHKLPPHT
GYAMNWSDS
GYARTFLWPGLWSVP
GYARTFWLPGLWSVP
GYGEDRERETWARWDRVTQA
GYKPRWHNC
GYLRWHVPHS
GYSLYPIITSQK
HAPSYPLETKLM
HCNAHLCNLPDGSPSSISSH
HCRKVTGSDYLLCGL
HDDSDLLLTFLR
HEARTVSTTYLML
HFRWANHTHFQT
HFSSRFSDLGKM
HGDISQINSSPW
HGLHQMSGNTKR
HGRFILPWWYAFSPS
HGRWWLRG
HGWLRWFS
HHALRLE
HHEWTHHWPPPP
HHHPPLA
HHPPFPP
HHRGAAPNS
HHRGSA
HHRHSPDNL
HITRLSPEPR
HKFRWHR
HKKFSSGR
HKRWYFN
HKTQTYPQAWMH
HKVVAYY
HKWRWWAF
HKWRWWAL
HLFEAH
HLFEAP
HLQIYYTSLA
HLRAMAGQI
HLYSAH
HMRWNTRGFLYPAMS
HNEFRQRETYMVF
HNHLGVH
HNISCDKSLCMLRESAPTTV
HPHQPIERQTVQ
HPMAPKY
HPMAPRY
HPPHFPN
HPPSHYCDIHSRLCHPNAPD
HPPSWGD
HPQAGAS
HPQGEDVQKSVVARWGDFLR
HPTGLFR
HPVHHYQ
HPWGYPKI
HPWTRTDS
HPWTRTIS
HQARPPWTV
HQKRVEESA
HQQLPTRWD
HRFWWTFR
HRGGTPKI
HRGRAA
HRGRAQ
HRHKHQ
HRLKWWLG
HRLYWWRI
HRVGGT
HRWCNFLR
HRWWWSPR
HSKWWVFR
HSNSRSAQV
HSNTGYP
HSSYFF
HTPHPDASIQGV
HTPHPMNLVAEA
HTRRKWGGE
HTRRTTHHILR
HTSLGHEDT
HTYTSHLRYVPPISL
HVDWRNSWR
HWAMTRWHILANNVMNRRTCD
HWDRVRLTMLRSRLKDDKKKH
HWEKIRDNVIHKSDRSYYQKH
HWGIIRQKIVVAHDIFQCKDY
HWGQGQSAQ
HWGWPLGRLT
HWLVHH
HWMRTSQRVRVNNAFHKYMGY
HWNAIKNVVHSQRMTKKIAMN
HWNKLSYTVRIGEIKRYVWRN
HWNKVASERINKMRRKAILNY
HWNQPRWSS
HWNRFV
HWSKTQGGNKRWRMIGAVVAH
HWYRFM
HYIAGTVQG
HYRTLGDHR
HYSSASHANNVCDAHYCLLP
HYYMEATRDIEMV
IARSAIHDLWSL
IAWYPY
IDTDLLYVITQS
IELGEPKKVVVRHSIIGSHL
IERPLHESVLAT
IFTPAWLLQL
IFWYPY
IGEQGWRHR
IGEQRWRHR
IGSPSTN
IHSYSYASDNMCTDTVCFIH
IIQYRIPHRPPTQHL
IKSLLRKEL
IKSNPQTSNEFL
IMVLCPLWLWLGTTS
INIDGVAMDIGM
INMMRGAGL
INVPMMVDGITM
IPALWSF
IPFPTLFAP
IPNAPIWIK
IPPALSISQ
IPWYPY
IRKSSR
ISLNFENYV
ISLNIENEA
ISRDYKVDDA
ITLNREDHT
ITSHHGRPRALI
IWHMQNARV
IYNPLSLLKWELPFP
KAHDLSTASRPHVVT
KAQEKV
KARGFQTPI
KCCYSL
KDETWRWGR
KDMGRYGEDREHKVREWMRQ
KEAASTSSADRR
KFDRFL
KFQSPIAWGFVR
KFYRFL
KGWLGGRAS
KHAFADSTAKPWVGR
KHIHTSVAE
KHRWWYQW
KKIMSYHAL
KLAGGWMQGHTVVPSREAKA
KLARRG
KLPSYRPYM
KLSQSTSPPVTG
KLTFLNYAEVLR
KLTSSLRCNCPPLRF
KLTSSLRYNSPPLCF
KLWMAH
KLYGFV
KLYRFL
KNTYPI
KPDSMP
KPFHNST
KPGDPSALHVVRCWIC
KPGEMR
KPGEMRGAA
KPGEVQQ
KPGYSSA
KPHAPHR
KPMESGRRTTVYY
KPPHHPR
KPPHPVY
KPPQVPL
KPVENRA
KPVKVPR
KQSRRG
KQSYLHHLL
KRFVWRGQAL
KRNWMNHGF
KSEGKAEAVWAFKAHGSAVS
KSGKEVERR
KSKRGHLLL
KSTSSLRDNSPPVCF
KSVAFMKGR
KTNNTVCSKSVC
KTSRRG
KWNRFA
KWPVAVTLAAGIRIP
KWTMMVSQV
KYDRFVIYKDGSVQT
KYIEPGLRVR
KYIEPRFLAM
KYLEPWYACG
KYLYSTTSSHVV
KYPTPQHPTKFTQHS
KYSDSVSLTHRI
LANKHQRLHAAD
LAQDKV
LAQHKS
LASLCNPKPSDAPVT
LASSVKSAEVGCAGY
LCMVRNLLTSPLHHA
LDSDLQLFFLSS
LDVVLAWRDGLSGAS
LEHFRWMKPI
LELFRG
LELFRR
LELKSNSVIMRWP
LEQMRWMKHT
LERTRQPLPGPP
LETPPNRNS
LEVCSE
LEVPLRQHY
LEYPWH
LEYSDLDRMTWP
LFDLPWL
LFDRESNDW
LFNLPWL
LFSLNAPGL
LGAENSGGQDRSDVTAARYG
LGEDKERHRESWLVYKTLTW
LGGVHYWRR
LGLFRR
LGNNDDLLFFNL
LGPYSLNWC
LGQRTPKSY
LGQVEYMRR
LHAETRSAMHRT
LHARQLPRG
LHHHH
LHMTLS
LILFSYDFHGDYYFY
LISPEQPPQ
LISWENFAQ
LIVQDRPPSRKQHPP
LIYLVN
LKPISSHPSTVA
LKRSKLR
LLRWGGLAV
LLRWGVSAT
LMGLRLGLLP
LMNWRGFMVPRESPK
LMWNWMFEVM
LNDLWSISDPEW
LPALDPTKRWFFETK
LPDLWR
LPDRPRTQPFVHELP
LPFYPY
LPGIMSL
LPLTALA
LPLTALP
LPLTPLA
LPLTTLH
LPLVVTPTSANG
LPPGLHVFPLASNRS
LPSRQHPRSNAYRPF
LPVTPLP
LPWRMSGHV
LQALAGPRV
LQHRWHKLE
LQNAPRS
LQSFRQAPVDIWW
LQYSTAMGPQQMTSW
LQYTPSWMLV
LRCPEPGCLL
LRCYSHCTFYFASST
LRGARFSEW
LRHSIL
LRHSVI
LRLSRK
LRMMKSTMI
LRSM
LRSTNARSA
LRYTLETRWAVLSVY
LSGLRLGLVP
LSLNHARSP
LSLNHHNNW
LSLNWGSSA
LSLNYAGAE
LSMQLSYLL
LSPKLPT
LSSREPQAR
LTFEHYWAQLTS
LTHPRWP
LTLMQAKRL
LTLNHASSG
LTLNMDSGQ
LTLNWPGDM
LTLNWSKTL
LTLNYADNV
LTLSHPHWVLNHFVS
LTPSWMLYMH
LTTEPDTTKFWPAPS
LTTHMSDLDRMH
LTVQARPVG
LVAVPT
LVGTPNKTK
LVMMRGTGV
LVPPSFS
LVQRYDHRT
LVRAYAGLARIILKW
LWQSFMQMA
LWVPSLFFSKLS
LWYATE
LYPLHTYTPLSLPLF
LYSLNWQDL
LYWYPY
MAARWVQPMPFSKWTESLRG
MAQERFLEM
MCPEMSFVAVHSCAR
MDAYDKISK
MEFKGALQYRLQP
MEFRAGSHA
MELKGQTDMFYII
MEMKKTHPVLGA
METYLRISS
MFGEDNYEFHFR
MFHRMSGLQ
MFNLPWL
MFQRMAVDA
MGVGAKRPG
MHKNNQFHWPSIRYL
MHRHPPPITLPL
MHRHPPPITTAA
MHRPHFNPTLAT
MHSFYKGPGRRGYDTLWNQF
MIFNSRGFLSLMSSG
MKAVIGRTM
MKGLKAARM
MKHPPRI
MKPSCAHADHGALGWMRGRL
MKRSPNEPHH
MMFKGQRVERVLT
MMSRMLGQT
MPFLINRWPPVNQLL
MPLMPTARSSMS
MPRQYTQMI
MPVSRLCIELDWCPP
MRMGYDNEKYHT
MRNVTERHW
MRQLQGQTL
MRQMNAARL
MSPILDFPSRKTHKT
MSQSERLDDQWTWWEFL
MSQSKQLTITEFLQWL
MSQSKRLDDQLTWLEFL
MSQSKRLEITWWEFVE
MSQSKWLDDQLTWLEFL
MSQTKRLDDQLYWWEYL
MSVWVTHNRVESWFA
MSYLEG
MTMPTM
MTSPWR
MVNGRSRAVFYYLGPGRLKM
MWDERWEQEELLGRRLLEAP
MWRPDF
MYGLMLAQR
MYWYPY
NACYVDLFLGASVCP
NAFHSHI
NAQNYSQQAPRP
NCEVLKTQRWRKVLQQHIIRH
NCKMQPQNWYHVYRMSRLVKN
NCLKQRLLRTPYLMMSRAVTH
NCPSTRKRWIVYLYRGRLINN
NDSNCTDTLCYVYPLHSNPG
NDTYSDLTRMIH
NEAHSSGITIMLR
NEMTTMIEW
NETRRWDILI
NEVPWRGFQDPN
NEWGSKDELEFYSHLVSSLR
NFMESLPRLGMH
NGITSLNHT
NGKWARGWS
NGYRKQDGE
NHPIFYARW
NHRLSSPRNPHLYAV
NHVHRMHATPAY
NIHHCNHIYCTIPSHS
NILSGFHYRNGDGRT
NKMWGK
NKPGERT
NLAPIKVSLTSL
NLGRMGARH
NLLSVAPFWPLNDSL
NMPKPI
NMQSDAWKLLHN
NNHPWYYGRSHHVSG
NNLLPPY
NNYDDISLRARP
NNYSAWLRCLLRAYS
NPFCSWYRWRNWCTK
NQDVPLF
NRKDWIERTL
NRMWGK
NRPFIPT
NSKGKMNTCHKVGNS
NSLRKYSKLK
NSLSMAPQQGWVQTG
NSPETPDWMV
NSQLTKSPSMKHRVE
NSSASSRGNSSSNSVY
NSSGSCDHFLCIIPTSNTHT
NSSPYLNTK
NTFALVPDWLGSPHGHSHHP
NTFREYWNQLPT
NTHKDRVHL
NTLYAVAPPVIYV
NTNTLHL
NTPQGMT
NVNCNASVCTIPDRLITDNP
NWDKVRSTFKKCHSIVIFKRN
NWEILRSKYNSHMTKSNVFTY
NWENKSDVLNKMLHLRLITN
NWHKVFIRRQSKKLVYNTIKN
NWINNVRLRIHTKRWLLKSNH
NWKSIIQRNLRWNKFKRFYQD
NWLRLVPRIKALNKVQVKNHN
NWNILRQEVMKMGPAKDTVRN
NWNRVRRYCKCKYTLVAKNNY
NWNRWRWIYLAQKNHKECLKN
NWNTVWSAYRRASSKLTKKTY
NWQEFQAKRSVAY
NWRALRGAL
NWRKAINLVRKWRNNDDPNKD
NWRNLRLKWRRLNSVHRH
NWSDIRMHGLMRRREKNVLNH
NWSSLY
NWTPPFKTR
NWVKLRQRVTLAKRVAVNLNY
NWYTVKQMMIKDRRRSQAMYN
NYDYMGIW
NYLGMKPRV
NYQMMGTMR
NYSPMGARL
PAGEIKVGKLRQLQR
PAKPRAAT
PALLCR
PCSVHT
PDLWRF
PDSQQINLE
PDWHEM
PELWHTPV
PFKHLPW
PFQFLPW
PFQYLPW
PFSFLPW
PGPSRAHFL
PGSHTPVPRAWAT
PGYPWH
PHESDATVR
PHNRQESPA
PIFYPY
PIRVPGFLG
PISSTRIEG
PKAGGARPTW
PKMTLQRSNIRPSMP
PLFVRY
PLPQML
PLVSLRDHS
PMAIIGPQQMHLVLH
PMFQLWEGQ
PMSQYSVGQ
PMWMIG
PPFYLKEVR
PPGDTVYRPIHW
PPGGTRPTGIQF
PPGKLPSYRPYM
PPGTPPNRNS
PPGWRAPRL
PPLKPVIDE
PPPFYRRGE
PPPIFRYYEYWPTSY
PPPLYF
PPPRTPTQSLPMTFT
PPRVPTTLR
PPVDRRHVAA
PPWYSKTDL
PQEVKQARKWIIE
PQEVQGIAVEWV
PQNSKIPGPTFLDPH
PQSPGSSFP
PQWFSWWRPA
PRFIEPEGVS
PRFIEPRVSR
PRFVEPRKET
PRLKHVQSV
PRPEWRVHW
PRQHPTLDRAVRLGS
PRQLHGLHWNFSPVR
PSATSPLEK
PSPSLSHPL
PSWEDD
PTAQRWRFR
PTDTWQAFWLRHPQNHVFLA
PTSLLWW
PTTPKSILHFLFPLF
PVLCIT
PVLLFCFLAGRCVSV
PVNDHPLEK
PWCWMWTKGRWYYVA
PWGTPEWLLE
PWMQLRNRV
PWQAMRGWL
PYLNARGFSVTREQI
PYSLNWPDE
PYWYPY
QAGWYWWVR
QAPRLMSSLSYFPQS
QAVARWHHV
QCGDVK
QCVSIM
QCWSPSL
QDDILWEILAVD
QEEFVHGMDRERVVWLLTSA
QELIGSYSVMPTN
QELRGKISIQPFK
QELVGANIETYML
QEWRQLTRWCWVQIK
QEYKAHHSYKLMS
QFCGWGEFEVRVLWP
QFVFCW
QGRVMGPQQLYVMMR
QGWDHLYGPYYFTAADEGNL
QHANHQAWNNLR
QHKTQPLNVISF
QHTYWPNYTPLL
QIPQRTATR
QIQWCWVNHRWSPVV
QIRALGMLT
QIRMNTNEF
QKPIKL
QKSTMTGWQQMGVMG
QLELDAQRG
QLPTTLP
QLTDAIRQH
QLYRFH
QPKQFFQ
QPRLSTKKTPSSPIA
QPTSEGL
QQEYMSGQYDIIF
QQLSYGPQQQHAHMG
QQMEVSRYVQYKW
QQPVSSWVFVSSDAI
QRILQQINLPRI
QRSPHST
QRYNAMRAA
QRYRFH
QSLNWPRDV
QSPLEDRILRFLSPP
QSPSARS
QSTLNPT
QSYHELLLQ
QTATVSYWCYWWWKV
QTNVKYDRFDWLLRQ
QTPPMQSPSATE
QTSDSLGGKDDESWHTTAKL
QVGKYLGLG
QVGPYEWRR
QWTWTQY
QWYRFM
RAAGIV
RAEAQYSVV
RAHTGIMDLWGF
RAQEKV
RASWLLAFVKRAPFS
RCDRLM
RDGKEGTQEAMYVMERYSIL
RDGQRLTSSKTMLPY
RDLHSNDVV
RDQHKS
RDQHNS
REDLFDRYAHLRTPV
RETADDLLSLLL
RETPLWLMED
RFCDTS
RFDRAGSRD
RFDRLK
RFDWLK
RFHAKF
RFKSMR
RFRGLISLSQVYLSP
RFSVETQI
RFTQMGALA
RFTQMMAVA
RFWAKF
RGAIEP
RGCGVDLLDCLL
RGFRHMMAA
RGGVHDWAR
RGMTLS
RGRLDR
RGTQEWTELWVSFRA
RGWMGAAAMLLDPPN
RGYPVVDWIFME
RHLYCWTWRWCHFKD
RHRSGTASASKMSPI
RHSVIS
RIENFRWQRP
RIFYPY
RKEPWGEMS
RKLLRT
RLDPPI
RLKSMR
RLKSSR
RLLVFRYWNLFPNVS
RLLWRV
RLNPHHEPM
RLPPFSRKL
RLRVKN
RLSRK
RLTRELYAQ
RLVCWRLGCVSPMGS
RLWLHRHKLV
RMKSSR
RMNRPK
RMRIDPEPRH
RNCTVIQFS
RNEPPL
RNLPPIFNDVYWIAF
RNRRSIQRPMIS
RQHPKL
RQLRSM
RQSRKRP
RQTVEGHRL
RQYRPG
RRGEVLGAR
RRHHHH
RRKPEPLLPN
RRPTMMKHT
RRQEVTYSW
RRTPDPAVSPWQLTY
RSFSRVLEE
RSLNLQDFN
RSQIPVREL
RSRLIW
RSSMSI
RSSYWVYSPWRFISR
RSTSSCSER
RSYSLAPGR
RTGHSHDPRSMPKSC
RTHDNSWNYTSS
RTPPLAETPEWQYQRYLFLL
RTSPWR
RVDRLM
RVFQNLRAS
RVNPEPGRWA
RVPPRYHAKISPMVN
RWDPPI
RWFHRH
RWSDMA
RYEFLDYWSQLH
RYIMNHRGFYIFVPR
SAHGTSTGVPWP
SAKLMGH
SASLWFL
SAVGFWKSRLAGAYF
SAWGRNWHN
SCNDNKSVPCIVPQL
SCNDYVCLTPHPKTPLYEKQ
SDLFKL
SDLGKL
SDLHKL
SDLNKL
SDLNTDPSHPST
SDLWRL
SDLYKL
SDPDQWPFWRANEYG
SDTCTCHTR
SEFRHPHPHLPPFDV
SFHYQNR
SFLVQTAKQ
SFQWRPWHI
SFTWLPW
SGFVAGKGFRLDFGS
SGHHSEMRALKSSLRHSVIS
SGPFIWNFWLGARAV
SGSSTP
SGTSHSASTTSKWFL
SGWSAFYNVAFFSTR
SHGPKNFGE
SHIMPPN
SHKQTGPG
SHLVRGSFGAGVLVR
SHPTLMPPLARMPSL
SHTPTKF
SILPYPY
SIMMMGAVR
SISPWGFSGLLRWSY
SISVIQE
SIVRLQV
SKFEPISKYLQP
SKLSPAMPGEDKERELAAKL
SLASRPHHPLKNYAP
SLHYSRDQLVAL
SLNREDGLL
SLNWSDRTI
SLPETPQWMI
SLVNIPRYFVGPGRRPMLVL
SLVPSPLLYIGPGRLRMTDH
SLYPGVFALIRSSYP
SMAATVGAR
SMEFAATVTSTFE
SMEPALPDWWWKMFK
SNAVLSGHPQNDYQAFVALR
SNDGVWAIP
SNGHSVRQM
SNPNYPGDLWMF
SNQIPSSARAFI
SPLNLCFERCFTSPN
SPPLQCSQYPNSLRC
SPRRSERLGW
SPTTVADLWAIM
SPTWRWAPY
SQELTQRPYKWH
SQHWLSMWS
SQLRTRLKG
SQMPIF
SQMPPL
SQYGIRGSFLLYVLP
SRCGLLVE
SRFADFFRNEGLSGSR
SRGDYLSWEAYKTLMGASSS
SRGGSNMRE
SRGSHEWAVLFRFYY
SRHRHH
SRHWEGRGK
SRLNVEPLTTYS
SRLPKR
SRLPLR
SRLPSCKRSYCSVAH
SRLPSYNHFFILGSH
SRLVGYCTRSPAVCR
SRMSPLVPLRNS
SRTSSRT
SRWAEVWDDNSKVSR
SRWQALFDDGTDTSR
SRYIGS
SSAKSHCYAFCSGLP
SSCQNSPAL
SSGPPRAPGG
SSGRYARLG
SSIRISYTARFSGFL
SSKFAALWDPPKLSR
SSKTRSFGVHLVGPY
SSLLPTT
SSLNFADVY
SSLRGF
SSMRKSFPEP
SSNTPRFKEYFMQSR
SSPIVS
SSRFESLFAGEKESR
SSRGLLWDLLTKDSR
SSRQGLIDCLWSCTH
SSSGFW
SSYCNNSLCLVPSYPDHSNT
STEPDLLWIIMG
STEPDLLWIIMS
STKPSSIGTLHTSPS
STRGWPWAR
STSQPTVSTLRP
STWTYGWMMV
STYFDPHGTHPQ
SVELRSIQLIGIGRNFHWMG
SVFTPQWMLR
SVLSHVRTVVLFSRS
SVPAGADQVSFHTDRALGAV
SVRQGPVQK
SVSVGMKPSPRP
SVTSATPRGERHVSP
SVWLRWRGC
SWAPPFKAS
SWRHIQTRV
SWRPPFRAV
SWTPLWMFYE
SWTVVHISS
SYGHPLGKPH
SYGHPLGLPQ
SYGRPLGKRL
SYISTWLNFLFCGQS
SYKDFDLRKG
SYPDLHL
SYQRAHHPPVLR
SYSSPPSKAVRE
SYSWMYE
SYVSYNEGE
TAALWRI
TADFLYLITTWS
TAFQLS
TALATSSTYDPH
TATLWRI
TDAFSDLGRMLANPG
TDFLSYYRVYRTPLQ
TDGGGWMVGYRM
TDYLEVRSQPIIY
TEAFRWDMRA
TEDRDLPEVLGGWMRGRYPN
TEPIVS
TEVGNMASRVRHSVIEAANG
TFAEMKGTVSYAL
TFEQEVRAPNISW
TFHFSTDLWRLA
TFMPSYYRSWGPPPT
TFRLLALWRGGLYPG
TFRQMPPRL
TFRVVCSLPRAGCTAH
TFSGGHKWSISGRSA
TFTRVVTDVYRGRLS
TFYRMGTQM
TGAPNSDLFKLS
TGTLLL
TGVSWSVAQPSF
THDLSSRASSSLSYN
THMWRN
THPLLLS
THPQVWRML
THSAKTSLEGIDREAMVFIW
TIGAITS
TIGLITS
TIPYHVPYKPPR
TKGGNWRMM
TKGKVDTGTIFGNAPRMAIS
TKTDTWL
TLDTAH
TLHPAHP
TLIPRSFCPTHDRDC
TLRHSIIFGGEW
TLTFFHR
TLTTLTN
TLWDLIP
TLWPLSP
TLWSFMP
TLWVPSR
TMGFTAPREPHY
TMGFTAPRFPHY
TMRWGFPVGR
TMTFPENYYSERPYH
TMTPPTR
TNARQTGR
TNKLMGPQQSKMFYW
TNLPPIFYDLHCFAF
TNPNRRNRTPQMLKR
TPAWLDPPT
TPHNTST
TPMNHHSQHAER
TPTTDGP
TQASAELERHSVVIRQPRFV
TQGKRGYNS
TQLRGRRLN
TQSLASR
TRHDYRQVL
TRHRHVPRFLPLRHV
TRLNFEDAG
TRTPYWMME
TRVMFDRGITHHCCH
TRVPRR
TRWAGRP
TSDLGMYLFGSV
TSDRLLTIK
TSFAEYWNLLSP
TSGLASR
TSHWDYKCWE
TSLDRI
TSLPPPRQPHPHFVP
TSLSWSKPPTRSSPI
TSMARYVRHSNYKHM
TSMLRNTSS
TSPHRPSAIGVLPPL
TSQYQSPRAVHP
TSRHEQARN
TTCKYYLSCRWRKDL
TTLHWASLTTGR
TTRLVDLWGFHL
TTSVLLHCIEWTILNQ
TTSWHGRPDRNL
TTTLSLVPLRPN
TVGGWMWGQGLKMAGQGRQS
TVRPFTL
TVSAGIICSFLSVSC
TWKDRSTGGGMDMPGWHLQF
TWKTSRISIF
TWNSLRGRL
TWPVVHGACRAHGHC
TWTWCWRNYIWQLST
TYALTSSILVYLTSS
TYLPWPA
TYLPWPP
TYLRARL
TYPFAPW
TYRGMAGFR
TYSATV
VAFVRTYVAGTGGFF
VAQGMAGQDKEREFRERLQN
VARVGSPPD
VASIGGKDNEEAVWEHRGAV
VAVVGTFPD
VDYQLRGAGY
VEGQGSVSD
VEHLMEVQRKTTW
VEMMRWGQTA
VETPEWLLVM
VFKSAR
VFLGDPSVE
VFQFRASVGGSHTVI
VGDAGHSME
VGEGYREES
VGQTKPKVEKLGESTSMRLL
VGRAFS
VGRDSTLND
VGRWGDFWL
VGTDSNDAG
VHGEMVRKSFNSTTSRVPRT
VIMEAVGRKTILQ
VIRYKDVRKYYLGPARAVLT
VITPDPSEV
VKDALHHVDHTCSTFLCALP
VKGELRGVDERTRVMQQYG
VKKSGR
VLDSVSSPD
VLGAQNTKHLGPGRFWYLL
VLPVGAGTD
VLSYRWDHW
VLYQAH
VNENQLVMD
VNVTDAGID
VPAAYIGND
VPGQKQHYVQPTAAN
VPGVSF
VPQTSLAME
VPRSAPTLWLGT
VPRVRWSPEP
VQAHGWGRP
VQSLPSP
VRALWEAKS
VRKSAR
VRLPGKLLRSCERGF
VRTWNDRGFQQSVDR
VRYPSDLLLMIL
VRYYDDYHR
VSATLEPVD
VSIGFYGRVQYHS
VSLFYTSHVAVRCCN
VSPMEIWTTCTWWSS
VSRHSM
VSRLIV
VSSGPHW
VSSLVLLSHGGPHSS
VSTPGSPDD
VSVYYGSFCLHSAYG
VSWEAYGEGAAGFFRLAEAL
VSWYIS
VTANPDSSA
VTMFESNAD
VTNDPSLDD
VVFYDYGS
VVIDRWEIR
VVNQGDPPD
VVPRFWFWLHGPGPF
VVRAFLGISLGLWSV
VVRDPGVSG
VWQGVRAHV
VWSVFL
VWWRALLVFATLYSV
VWWRFM
VWWYPY
VWYQFPVGK
VYAVKQGIRLRYYVGPGRIL
VYKSMAPQQTNAWQH
VYQNSESTL
VYRAQGPQM
WAETPLWMMM
WAETWPLAQRPP
WAGPTPSDE
WAGRSISYK
WARHRTGSE
WASVRTHF
WAYYHAGHSSFAVWT
WDFPAY
WDGQWDTLNW
WDRIMGARM
WDTVRICF
WDTVRISF
WEAVAAPIMHTWV
WEFPAY
WEIKSLSGI
WESCGTHF
WESVRTHF
WFGQLQAAQ
WFRWGTAPAP
WFSFMS
WGEDPEARR
WGNARKSPEP
WGSPVGLGH
WGSRAESRV
WGSWRCR
WHQNRGGQA
WHTFADMQLMYPLKE
WIATTLMRHSVV
WIGQMYAAK
WKGLQGALS
WKHTSQPPRLIF
WKMSSWRWD
WLASDLDKLVLG
WLPKYPLESTNSLTN
WLYRFS
WMAMSVSEK
WMSPRHLGT
WNITWSFS
WNKLGGALV
WNRSPAFSGPYL
WPDMVR
WPGWHHVPPAVS
WPIVDVSAP
WPPLSSVL
WPPPARVI
WPQLQRLI
WPRPCRHS
WPSLQAIR
WPTLSKIA
WPYSCGQDNTSKVANRYARF
WQMAMSRHL
WQNLSGARS
WRHSVV
WRISGGLVYFMRYAS
WRPDFG
WRPFEL
WRQMYRAQL
WRSLRTLLE
WSLNWRSPQ
WSPGQQRLHNST
WSPKRCR
WSPSASRF
WSSGMTPDTGAP
WSWWRNTHE
WTESGRLTKRESSTNKNLGR
WTKLKNSRGFELQLD
WTKQYR
WTPSASRF
WTSRTLSAR
WTSVMVSAF
WTVRTLSSR
WVAGYWWCWSVMYRS
WVCTWNYWTRVTWCL
WVLRSIRAQ
WVQMKPTIA
WVSHFSVFAFPMSSW
WVSLRQVEPG
WVVVTLNLW
WWDGQF
WYAWML
WYDAKMRHS
WYHHQIART
WYLGYWPGQE
WYSWLL
WYTAQRSLY
WYTLLKSRL
YAAMRGGQI
YAGFAQ
YARAQGHRL
YASPSLFGFPFALEA
YAWGWG
YCHKYTVANESHWSKIRLKMY
YDLNWPQNA
YDWLYE
YDYGSFSK
YEAHYQYG
YFHDRLPKPQTMKPS
YFTIPATLLPFGV
YFYRFR
YGAFFK
YGAFFQ
YGAFGG
YGAFMQ
YGAFQG
YGAIGF
YGALDT
YGALEL
YGALGG
YGALSW
YGAWTR
YGAWYT
YGDFAF
YGEFVL
YGFWGM
YGFWSN
YGGEGLVSWG
YGGFGF
YGGFLT
YGGFPD
YGGFSP
YGGIAS
YGGIAV
YGGIRP
YGGLEM
YGGLGI
YGGLGL
YGGLGR
YGGLNV
YGGLRA
YGGLRH
YGGLSM
YGGLVR
YGGMKV
YGGWAG
YGGWGP
YGGWSS
YGKLRGGTL
YGKWSG
YGLWQS
YGNFAD
YGNFPA
YGNWTY
YGPFWS
YGPGLRWKS
YGRFFH
YGSFLH
YGSFMA
YGSFSL
YGSLAD
YGSLLS
YGSLNG
YGSLVL
YGSLVQ
YGSLVR
YGSLYE
YGSWAS
YGSWQA
YGTAPEWVLAFRLAF
YGTFIL
YGTFLN
YGTWST
YGVFSR
YGVWAS
YGVWWR
YGWANK
YGWLAT
YGWWGL
YGWWLT
YGYLVN
YGYWSL
YHKRPVGTP
YHPMPVP
YHWAHWVR
YHWPAWGQ
YILGPGRGRFPGVNCMPYI
YIMQMNRVV
YKLLRATQM
YKMGRTSRW
YKPGEWA
YKPLWGQMT
YKPMLASVG
YLENLSLPNR
YLETSRTYTTVWP
YLHQPGRIDCTARPLEKCSR
YLRMLQILK
YLRWMY
YLYRPY
YMEMRGSTTVFFN
YMMQKSVRA
YMRYYESSLKSYPDW
YNEYRATPTFAVV
YNYGWVEF
YPPRFQYYRFYYRGP
YPYAYIWT
YQALRAYWQ
YQQMGARLM
YRAMQTTLS
YRDSNEHQP
YRGMQRRTL
YRGMSAFRA
YRHAQAYGV
YRHSIV
YRMQSNHVS
YRQMSAPTL
YRQMWVNRA
YRQQEVKRHIQIV
YRSPWR
YRVSLSVLHNSLLPS
YRYDIFRE
YSDLGK
YSDLWKLYRFDA
YSFPHTT
YSMFKE
YSNASARELGAT
YSRHSVVYGDGQ
YSYPYYHL
YTDSNERTT
YTQKHKHQA
YTRISNDHHCDTTICHINST
YTWVAVQSSR
YTWYPY
YVYYPY
YWDGQW
YWELEWAP
YWKRYRLMALKANFGSRYSRN
YWNHELRVRLINRIKMTN
YWQRLQSMLKRVDPRPYRVRD
YWRQKAKDDLMVRRLRRAVKH
YWSELRRKKWWKVWKLSSCPH
YWSLIVSKLRRRKVMNDPSTY
YWSNRVTQSIKARYVIDSWQD
YWVFLKKKMKLENKCVRVVKN
YWWTWSRAG
YWYRWS
YYGKMPALV
